# Supplementary material for: Synthesis, characterization, X-ray and electronic structures of diethyl ether and 1,2-dimethoxyethane adducts of molybdenum(iv) chloride and tungsten(iv) chloride
Source: Royal Society of Chemistry journal article supplement (doi:10.1039/d2dt00787h), 2022-01-01
Supplement: d2dt00787h1.pdf [file d2dt00787h1.pdf]

## Supporting Information

### Synthesis, Characterization, X-ray and Electronic Structures of Diethyl Ether and 1,2-Dimethoxyethane Adducts of Molybdenum(IV) Chloride and Tungsten(IV) Chloride

Thomas E. Shaw,<sup>a,b</sup> Timothy J. Diethrich,<sup>c</sup> Charlotte L. Stern,<sup>d</sup> Brian L. Scott,<sup>e</sup> Titel Jurca<sup>a,b\*</sup> Thomas M. Gilbert<sup>f\*</sup>, and Alfred P. Sattelberger<sup>a\*</sup>

<sup>a</sup> Department of Chemistry, University of Central Florida, Orlando, FL 32816 USA.

<sup>b</sup> Renewable Energy and Chemical Transformations (REACT) Cluster, University of Central Florida, Orlando, FL 32816 USA.

<sup>c</sup> Department of Chemistry and Biochemistry, University of Maryland, College Park, MD 20742 USA.

<sup>d</sup> Department of Chemistry and International Institute for Nanotechnology, Northwestern University, Evanston, IL 60208 USA.

<sup>e</sup> Materials Physics and Applications, Los Alamos National Laboratory, Los Alamos, NM 87545 USA.

<sup>f</sup> Department of Chemistry and Biochemistry, Northern Illinois University, DeKalb, IL 60115 USA.

#### Table of Contents

#### Materials and Methods (p 3).

**Table S1 (p 6).** Crystallographic data for **1**, **2**, and **4** at 297K (**1**) and 100K (**2**, **4**)

**Table S2 (p 7).** Atomic coordinates ( $\times 10^4$ ) and equivalent isotropic displacement parameters ( $\text{\AA}^2 \times 10^3$ ) for **1**

**Table S3 (p 7).** Atomic coordinates ( $\times 10^4$ ) and equivalent isotropic displacement parameters ( $\text{\AA}^2 \times 10^3$ ) for **2**

**Table S4 (p 8).** Atomic coordinates ( $\times 10^4$ ) and equivalent isotropic displacement parameters ( $\text{\AA}^2 \times 10^3$ ) for **4**

**Table S5 (p 9).** Bond lengths [ $\text{\AA}$ ] and angles [ $^\circ$ ] for **1**

**Table S6 (p 10).** Bond lengths [ $\text{\AA}$ ] and angles [ $^\circ$ ] for **2**

**Table S7 (p 11).** Bond lengths [ $\text{\AA}$ ] and angles [ $^\circ$ ] for **4**

**Table S8 (p 12).** Anisotropic displacement parameters ( $\text{\AA}^2 \times 10^3$ ) for **1**

**Table S9 (p 12).** Anisotropic displacement parameters ( $\text{\AA}^2 \times 10^3$ ) for **2**

**Table S10 (p 13).** Anisotropic displacement parameters ( $\text{\AA}^2 \times 10^3$ ) for **4**

**Table S11 (p 14).** Hydrogen coordinates ( $\times 10^4$ ) and isotropic displacement parameters ( $\text{\AA}^2 \times 10^3$ ) for **1**

**Table S12 (p 14).** Hydrogen coordinates ( $\times 10^4$ ) and isotropic displacement parameters ( $\text{\AA}^2 \times 10^3$ ) for **2**

**Table S13 (p 15).** Hydrogen coordinates ( $\times 10^4$ ) and isotropic displacement parameters ( $\text{\AA}^2 \times 10^3$ ) for **4**

**Table S14 (p 16–17).** Calculated raw and relative energetics for singlet and triplet states and *cis*– and *trans*– isomers of  $\text{MCl}_4(\text{dme})$ ,  $\text{MCl}_4(\text{OEt}_2)_2$ ,  $\text{MCl}_4(\text{OH}_2)_2$ ,  $\text{MCl}_4(\text{OMeH})_2$ , and  $\text{MCl}_4(\text{OMe}_2)_2$  ( $\text{M} = \text{Mo}, \text{W}$ ) using various model chemistries.

**Table S15 (p 18).** Experimental and calculated bond distances (pm) for  $\text{MCl}_4(\text{dme})$  and *cis*– and *trans*–  $\text{MCl}_4(\text{ORR}')_2$  ( $\text{M} = \text{Mo}, \text{W}$ ;  $\text{R}, \text{R}' = \text{H}, \text{Me}, \text{Et}$ ) using various DFT models and the def2-TZVP basis set. The basis set was def2-TZVP in all cases. The ether ligands are considered to be in the equatorial plane, so  $\text{Cl}_{\text{eq}}$  atoms are *trans* to ether O atoms, while  $\text{Cl}_{\text{ax}}$  atoms are *cis* to ether O atoms. Values are averaged for bonds of the same type.

**Table S16 (p 19).** Calculated (TD, nm) electronic transition energies for  $\text{MCl}_4(\text{dme})$  and *trans*– $\text{MCl}_4(\text{OEt}_2)_2$  ( $\text{M} = \text{Mo}, \text{W}$ ) using various model chemistries. Band positions are generally approximated within 10 nm, owing to a choice of a peak width at half height = 30 nm.

**Table S17 (p 20).** Calculated (TD–ULC–M06L/def2TZVP, SCRF=toluene, nm) electronic transition wavelengths for  $\text{MCl}_4(\text{dme})$  and *trans*– $\text{MCl}_4(\text{OEt}_2)_2$  ( $\text{M} = \text{Mo}, \text{W}$ ).

**Table S18 (p 21–24).** Optimized Cartesian coordinates (UM06L+GD3/def2-TZVP) for all triplet  $\text{MCl}_4\text{L}_2$  complex molecules examined ( $\text{M} = \text{Mo}, \text{W}$ ).

**Figure S1 (p 25).**  $^1\text{H}$  NMR Spectrum of *trans*– $\text{MoCl}_4(\text{OEt}_2)_2$  in  $\text{d}_8$ –toluene.

**Figure S2 (p 25).** Thermal ellipsoid plot and labelling scheme of **4**.

**Figure S3 (p 26–27).** Gouy Susceptibility Calculations

**Figure S4 (p 27–28).** SQUID Data Calculations

**Figure S5 (p 29).** Calculated frontier  $\alpha$  molecular orbitals for triplet *trans*– $\text{MoCl}_4(\text{OEt}_2)_2$  ( $\text{C}_{2\text{h}}$  symmetry, UBLYP+GD3/def2-TZVP, isovalue = 0.04)

**References (p 30).**

## Materials and Methods

### General Comments

All chemical manipulations were carried out using standard Schlenk and glovebox techniques in ultrahigh purity (UHP) nitrogen environments. 3 Å molecular sieves were purchased from Fisher Scientific and dried at 150 °C for 24 h before pumping into the glovebox. Basic alumina (50-200 µm) was purchased from Acros Organics and was activated by heating to 220 °C while pumping under vacuum ( $5 \times 10^{-3}$  torr) for 12 h. Diethyl ether and hexanes were collected from an mBraun solvent purification system (SPS). 1,2-dimethoxyethane (TCI) was pumped into the glovebox upon delivery and dried over activated basic alumina for 24 h prior to use. Molybdenum pentachloride (99.5%) was used as received from Beantown Chemical. Tungsten tetrachloride (97%) was used as received from Strem Chemicals. Allyltrimethylsilane (> 98%) was purchased from TCI and dried over 3 Å molecular sieves for 24 h prior to use. The purity of the organic reagents was checked via  $^1\text{H}$  NMR. Elemental analyses (C, H, Cl) were performed by Galbraith Laboratories, Inc., Knoxville, TN.  $^1\text{H}$  NMR spectra were collected on a Bruker Avance III HD 600 equipped with a cryoprobe. UV-Vis measurements were conducted with an Agilent Cary 60 spectrophotometer using an air-free cuvette sealed under UHP  $\text{N}_2$ .

### Synthesis

**$\text{MoCl}_4(\text{OEt}_2)_2$  (1).** Inside the glovebox,  $\text{MoCl}_4(\text{OEt}_2)_2$  was prepared as described by Persson and Andersson.<sup>1</sup> The only deviation from their reported procedure was that the addition of allyltrimethylsilane to the  $\text{MoCl}_5$ /diethyl ether suspension was done at -35 °C inside the glovebox instead of -78 °C. Starting with 9.3 g of  $\text{MoCl}_5$ , 12 g (90% yield, based on  $\text{MoCl}_5$ ) of rust orange powder was isolated on a medium porosity filter frit and washed first with 2 x 30 mL of diethyl ether and then 30 mL of hexanes prior to drying under reduced pressure. We note that green  $\text{MoOCl}_3(\text{OEt}_2)_2$  is present as a byproduct (< 10%), but it is highly soluble in diethyl ether and readily separated from the desired  $\text{MoCl}_4(\text{OEt}_2)_2$ .<sup>2</sup>  $^1\text{H}$  NMR (600 MHz, toluene- $d_8$ ;  $\delta$ , ppm): 21.55 (s, 4H), 8.76 (s, 6H).

**$\text{MoCl}_4(\text{dme})$  (2).** Inside the glovebox,  $\text{MoCl}_4(\text{dme})$  was prepared by dissolving  $\text{MoCl}_4(\text{OEt}_2)_2$  in minimal dme (~10 mL per gram of solid). The solid adduct is isolated in  $\geq 90\%$  yield from the dme solution by slowly adding an equal volume of pentane. The solid is isolated by filtration, washed with pentane, and dried under reduced pressure.  $^1\text{H}$  NMR (600 MHz, toluene- $d_8$ ;  $\delta$ , ppm): 16.32 (s, 6H), 1.17 (s, 4H). Anal., Calcd. for  $\text{C}_4\text{H}_{10}\text{O}_2\text{Cl}_4\text{Mo}$ : C, 14.65; H, 3.06; Cl, 43.25. Found: C, 14.51; H, 2.87; Cl, 43.17.

**$\text{WCl}_4(\text{OEt}_2)_2$  (3).** Scintillation vial-scale reactions to obtain  $\text{WCl}_4(\text{OEt}_2)_2$  were conducted as described by Shaw, *et al.*<sup>3</sup> Inside the glovebox, commercial (Strem Chemicals)  $\text{WCl}_4$  was ground with an agate mortar and pestle for several minutes. Then, 100 mg of the ground  $\text{WCl}_4$  were added to a scintillation vial along with 20 mL of dry diethyl ether. The vial was left to sit in the glovebox overnight which led to the formation of dark yellow, crystalline  $\text{WCl}_4(\text{OEt}_2)_2$  in the bottom of the vial amidst some unreacted  $\text{WCl}_4$ .  $^1\text{H}$  NMR (500 MHz, toluene- $d_8$ ;  $\delta$ , ppm): 14.42 (q, 4H,  $\text{CH}_2$ ), 5.08 (t, 6H,  $\text{CH}_3$ ).

**$\text{WCl}_4(\text{dme})$  (4).** Inside the glovebox, commercial  $\text{WCl}_4$  was ground as noted above. Then, a 125 mL Erlenmeyer flask was charged with 5 g of the freshly ground powder and approximately 100 mL of dme and left to stir, at room temperature, overnight in the glovebox. The solution gradually changes from a purple suspension to a verdant green solution that may appear to have a blue hint due to small amounts of unreacted  $\text{WCl}_4$ . The next day, the solution was filtered through a layer of Celite on a 30 mL fine porosity frit to remove any unreacted  $\text{WCl}_4$ . The solution was then stripped, affording 6.2 g of brown solid  $\text{WCl}_4(\text{dme})$  (97%).  $^1\text{H}$  NMR (600 MHz, toluene- $d_8$ ;  $\delta$ , ppm): 9.93 (s, 6H), 0.77 (s, 4H). Anal., Calcd. for  $\text{C}_4\text{H}_{10}\text{O}_2\text{Cl}_4\text{W}$ : C, 11.55; H, 2.42; Cl, 34.10. Found: C, 11.39; H, 2.24; Cl, 34.16.

## Single Crystal X-ray Diffraction Studies

Single crystals of **1** suitable for X-ray diffraction studies were obtained via the dissolution of the red-orange product in a minimal amount of toluene to obtain a saturated solution. This solution was then allowed to sit in the glovebox freezer (-35 °C) overnight, during which time dark red trapezoidal crystals of **1** formed. Single crystals of **2** were obtained by charging a Celite/glass wool plug in a disposable pipette with ca. 100 mg of  $\text{MoCl}_4(\text{OEt}_2)_2$  and passing ~3 mL of dme over the solid into a medium sized vial. This vial of freshly prepared  $\text{MoCl}_4(\text{dme})$  was then placed inside of a 22 mL scintillation vial charged with ~5 mL of hexane and sealed. This vapor diffusion crystallization was allowed to sit, unperturbed, in the glovebox at room temperature for three days, providing well-formed orange needles of **2**. Single crystals of **4** were obtained by taking approximately 700 mg of freshly ground  $\text{WCl}_4$  and allowing it to sit in a scintillation vial charged with approximately 10 mL of fresh dme overnight. Well-formed, yellow blocks were observed amidst a bed of unreacted  $\text{WCl}_4$ . X-Ray diffraction studies of **1** were conducted on a Rigaku XtaLAB Mini III two-circle diffractometer using a  $\text{Mo K}\alpha$  ( $\lambda = 0.71073 \text{ \AA}$ ) fine-focus sealed X-ray tube source and a graphite monochromator detector at 298.1(5) K. Using Olex2, the structure was solved with the SHELXT structure solution program using Intrinsic Phasing and refined with the XL refinement package using Least Squares minimization.<sup>4-6</sup> X-Ray diffraction studies of **2** and **4** were conducted on a Rigaku XtaLAB Synergy, single source at offset/far, HyPix diffractometer with  $\text{Mo K}\alpha$  ( $\lambda = 0.71073 \text{ \AA}$ ) micro-focus sealed X-ray tube PhotonJet source and a mirror detector at 100 K. Using Olex2, the structures were solved with the SHELXT structure solution program using Intrinsic Phasing and refined with the XL refinement package using Least Squares minimization.<sup>4-6</sup>

## Magnetic Susceptibility

Gouy magnetic susceptibility measurements were conducted on a benchtop MSB MK1, calibrated with an aqueous solution of  $\text{MnCl}_2$  (Sherwood Scientific, Ltd). Samples of  $\text{MCl}_4(\text{dme})$  ( $\text{M} = \text{Mo, W}$ ) were loaded into Gouy tubes inside the glovebox and capped with rubber stoppers. The measurements were conducted at 25 °C. A 122 mg sample of **2** was packed to a height of 1.90 cm in the sample tube, which produced a blank reading of -36 cgs. Both the sample and the tube produced a reading of +346 cgs. A 181 mg sample of **4** was packed to a height of 2.03 cm in a second sample tube, which produced a blank reading of -36 cgs. Both the sample and the tube produced a reading of +135 cgs. SQUID magnetometry measurements were obtained with a 7 Tesla Quantum Design Superconducting Quantum Interference Device (MPMS3). Approximately 65 mg of  $\text{MCl}_4(\text{dme})$  ( $\text{M} = \text{Mo, W}$ ) powder were added to a capsule in an argon glovebox. This capsule was then removed from the glovebox and quickly inserted into the MPMS for temperature dependent susceptibility measurements down to 2 K.

## Computational Methods

Optimizations and frequency analyses were performed using the Gaussian (G09<sup>7</sup>) suite. A sizable integration grid (keyword Int=UltraFineGrid) was used in all cases. The title molecules as well as *cis*- $\text{MCl}_4(\text{OEt}_2)_2$  ( $\text{M} = \text{Mo, W}$ ) were initially fully optimized as spin singlets and spin triplets at the UM06L+GD3/def2-SVP level, then at the UM06L+GD3/def2-TZVP level.<sup>8-10</sup> Convergence of the spin singlet wavefunctions for the  $\text{MCl}_4\text{L}_2$  required use of a quadratic converger (Keyword SCF=XQC). Stationary points were confirmed as minima using frequency calculations.

The restricted singlet wavefunctions showed  $\text{RHF} \rightarrow \text{UHF}$  instabilities. Consequently, subsequent optimizations using different local DFT approaches were performed with the molecules as unrestricted spin triplets (Supporting Information, Table S14). These were done to provide computational “error bars” for the energetics and bond distances.<sup>11</sup> Local DFT models were employed based on findings from Truhlar and co-workers that they perform better than hybrid models for transition metal compounds/complexes.<sup>12</sup> Frontier  $\alpha$  orbitals from the triplet calculations were visualized using Avogadro.<sup>13</sup>

We noted that the three DFT models employed gave different predictions of *cis/trans* preferences for  $\text{MoCl}_4(\text{OEt})_2$ . To arbitrate this, we performed optimizations and DLPNO-UCCSD(T)//UM06-2X+GD3/def2-TZVP and DLPNO-UCCSD(T)//UPBEPBE+GD3/def2-TZVP single point energy calculations<sup>14-16</sup> on *cis*- and *trans*- $\text{MCl}_4(\text{ORR}')_2$  (M = Mo, W; ORR' = OH<sub>2</sub>, OMeH, OMe<sub>2</sub>) and DLPNO-UCCSD//UM06-2X+GD3/def2-TZVP and DLPNO-UCCSD//UPBEPBE+GD3/def2-TZVP single point energy calculations on *cis*- and *trans*- $\text{MCl}_4(\text{OEt})_2$  using the ORCA program.<sup>17-18</sup> (The latter were too resource-intensive to allow calculating coupled cluster triples corrections). These employed auxiliary basis sets for Coulomb and correlation corrections.<sup>19-20</sup> The single point energies differed little regardless of the starting structure (see Supporting Information Table S14) or inclusion of triples corrections. They agreed best overall with the UPBEPBE-determined energies and *cis/trans* preferences. Consequently, energetics discussed below will involve the DLPNO-UCCSD//UPBEPBE+GD3/def2-TZVP data.

Absorption spectra were modeled using time-dependent density functional theory (TDDFT). Only the title molecules were examined. Several models were employed to determine which performed best (Supporting Information, Tables S15-S16). Very low energy *d-d* transitions were expected, so the number of states to be included in the calculations was set to 25. This ensured that transitions between 300–700 nm (the experimental spectrum limits) were included, with some loss of accuracy due to intruder states. The lowest energy transitions analyzed as *d-d* transitions, with energies 2000–5000 nm. The title molecules were also optimized and TD-analyzed at the ULC-BLYP/def2-TZVP and ULC-M06L/def2-TZVP levels with a self-consistent reaction field modeling the toluene solvent (Keyword SCRF Solvent=toluene). The overlaid experimental and theoretical UV-Vis graphic was generated using Kaleidagraph for Macintosh.<sup>21</sup>

## X-Ray Crystallography

**Table S1.** Crystallographic data for all crystalline habits **1-3**.

|                                                     | <b>1</b>                                                        | <b>2</b>                                                        | <b>4</b>                                                       |
|-----------------------------------------------------|-----------------------------------------------------------------|-----------------------------------------------------------------|----------------------------------------------------------------|
| Empirical formula                                   | C <sub>8</sub> H <sub>20</sub> Cl <sub>4</sub> MoO <sub>2</sub> | C <sub>4</sub> H <sub>10</sub> Cl <sub>4</sub> MoO <sub>2</sub> | C <sub>4</sub> H <sub>10</sub> Cl <sub>4</sub> WO <sub>2</sub> |
| Formula weight                                      | 385.98                                                          | 327.86                                                          | 415.77                                                         |
| Temperature                                         | 298.1(5) K                                                      | 100.00(10) K                                                    | 100.00(10) K                                                   |
| Wavelength                                          | 0.71073 Å                                                       | 0.71073 Å                                                       | 0.71073 Å                                                      |
| Crystal system                                      | Monoclinic                                                      | Monoclinic                                                      | Monoclinic                                                     |
| Space group                                         | P2 <sub>1</sub> /n                                              | Cc                                                              | Cc                                                             |
| <i>a</i> , <i>b</i> , <i>c</i> (Å)                  | 7.5956(2),<br>11.4732(4),<br>9.0193(3)                          | 8.0686(5),<br>11.3057(6),<br>11.6997(6)                         | 8.0766(2),<br>11.3089(2),<br>11.7413(3)                        |
| <i>α</i> , <i>β</i> , <i>γ</i> (°)                  | 90, 106.347(3),<br>90                                           | 90, 90.519(5), 90                                               | 90, 90.687(2), 90                                              |
| Volume (Å <sup>3</sup> )                            | 754.22(4)                                                       | 1067.22(10)                                                     | 1072.34(4)                                                     |
| <i>Z</i>                                            | 2                                                               | 4                                                               | 4                                                              |
| Density<br>(calculated)<br>(mg/m <sup>3</sup> )     | 1.700                                                           | 2.041                                                           | 2.575                                                          |
| Absorption<br>coefficient (mm <sup>-1</sup> )       | 1.560                                                           | 2.185                                                           | 11.724                                                         |
| R(int)                                              | 0.0199                                                          | 0.0389                                                          | 0.0358                                                         |
| Absorption<br>correction method                     | Analytical                                                      | Gaussian                                                        | Gaussian                                                       |
| Data/restraints/parameters                          | 2234/0/73                                                       | 2068/2/102                                                      | 3809/2/102                                                     |
| Goodness-of-Fit<br>on F <sup>2</sup>                | 1.067                                                           | 1.166                                                           | 1.052                                                          |
| R <sub>1</sub> ( <i>I</i> > 2σ( <i>I</i> ))         | 0.0212                                                          | 0.0372                                                          | 0.0224                                                         |
| wR <sub>2</sub> (all data)                          | 0.0516                                                          | 0.1093                                                          | 0.0558                                                         |
| Largest diff. peak<br>and hole (e.Å <sup>-3</sup> ) | 0.44 and -0.42                                                  | 0.486 and -0.815                                                | 2.322 and -0.760                                               |

**Table S2.** Atomic coordinates ( $\times 10^4$ ) and equivalent isotropic displacement parameters ( $\text{\AA}^2 \times 10^3$ ) for **1**.  $U(\text{eq})$  is defined as one third of the trace of the orthogonalized  $U^{ij}$  tensor.

|     | <b>x</b>   | <b>y</b>   | <b>z</b>   | <b>U(eq)</b> |
|-----|------------|------------|------------|--------------|
| Mo1 | 5000       | 5000       | 5000       | 27.36(7)     |
| Cl2 | 4992.3(7)  | 3729.4(4)  | 7057.4(5)  | 46.66(12)    |
| Cl1 | 1872.4(6)  | 4626.5(5)  | 3796.2(6)  | 48.42(12)    |
| O1  | 5717.4(15) | 3624.5(10) | 3799.6(13) | 34.6(3)      |
| C3  | 4791(2)    | 2483.9(15) | 3613(2)    | 42.1(4)      |
| C1  | 7190(2)    | 3718.0(16) | 3026(2)    | 41.6(4)      |
| C2  | 6481(3)    | 3603(2)    | 1311(2)    | 60.4(6)      |
| C4  | 6032(3)    | 1525.7(18) | 4386(3)    | 61.9(6)      |

**Table S3.** Atomic coordinates ( $\times 10^4$ ) and equivalent isotropic displacement parameters ( $\text{\AA}^2 \times 10^3$ ) for **2**.  $U(\text{eq})$  is defined as one third of the trace of the orthogonalized  $U^{ij}$  tensor.

|     | <b>x</b>  | <b>y</b>   | <b>z</b>   | <b>U(eq)</b> |
|-----|-----------|------------|------------|--------------|
| Mo1 | 5719.8(7) | 2344.4(5)  | 5022.4(6)  | 13.4(2)      |
| Cl1 | 5453(3)   | 1448.8(19) | 3234.5(16) | 20.3(5)      |
| Cl2 | 7216(4)   | 799(2)     | 5799(2)    | 32.9(6)      |
| Cl3 | 8044(3)   | 3422(2)    | 4555(2)    | 26.7(5)      |
| Cl4 | 5359(3)   | 3306.7(17) | 6765.1(16) | 18.5(5)      |
| O1  | 3313(9)   | 1597(5)    | 5383(5)    | 19.7(13)     |
| O2  | 4030(7)   | 3647(5)    | 4344(5)    | 14.5(12)     |
| C1  | 3029(17)  | 877(8)     | 6387(9)    | 32(3)        |
| C2  | 1975(15)  | 2455(8)    | 5218(10)   | 24(2)        |
| C3  | 2375(12)  | 3172(7)    | 4172(8)    | 20.3(19)     |
| C4  | 4444(11)  | 4502(8)    | 3471(7)    | 18.8(18)     |

**Table S4.** Atomic coordinates ( $\times 10^4$ ) and equivalent isotropic displacement parameters ( $\text{\AA}^2 \times 10^3$ ) for **4**.  $U(\text{eq})$  is defined as one third of the trace of the orthogonalized  $U^{ij}$  tensor.

|     | <b>x</b>   | <b>y</b>   | <b>z</b>   | <b>U(eq)</b> |
|-----|------------|------------|------------|--------------|
| W1  | 1332.5(5)  | 7363.7(2)  | 4805.1(4)  | 15.76(6)     |
| Cl1 | 1620.6(18) | 8327.1(13) | 3055.7(12) | 20.8(3)      |
| Cl2 | -172(2)    | 5811.1(17) | 4023.1(15) | 34.9(4)      |
| Cl3 | -998.5(19) | 8443.9(18) | 5285.3(15) | 29.2(3)      |
| Cl4 | 1569.4(19) | 6455.0(14) | 6588.2(12) | 23.4(3)      |
| O1  | 3726(6)    | 6631(4)    | 4434(4)    | 22.4(9)      |
| O2  | 3021(5)    | 8653(4)    | 5477(4)    | 18.1(8)      |
| C1  | 4000(11)   | 5894(7)    | 3433(6)    | 36.0(17)     |
| C2  | 5082(10)   | 7481(6)    | 4606(8)    | 25.8(14)     |
| C3  | 4695(7)    | 8195(6)    | 5638(6)    | 23.2(12)     |
| C4  | 2630(8)    | 9509(6)    | 6354(6)    | 25.5(12)     |

---



**Table S5.** Bond lengths [Å] and angles [°] for **1**.

|                          |   |                                              |            |
|--------------------------|---|----------------------------------------------|------------|
| Mo(1)-Cl(2) <sup>1</sup> | 2 | Cl(2)-Mo(1)-Cl(2) <sup>1</sup>               | 180.0      |
| Mo(1)-Cl(2)              | 2 | Cl(1)-Mo(1)-Cl(2) <sup>1</sup>               | 88.588(18) |
| Mo(1)-Cl(1)              | 2 | Cl(1) <sup>1</sup> -Mo(1)-Cl(2)              | 88.589(18) |
| Mo(1)-Cl(1) <sup>1</sup> | 2 | Cl(1) <sup>1</sup> -Mo(1)-Cl(2) <sup>1</sup> | 91.411(18) |
| Mo(1)-O(1)               | 2 | Cl(1)-Mo(1)-Cl(2)                            | 91.412(18) |
| Mo(1)-O(1) <sup>1</sup>  | 2 | Cl(1) <sup>1</sup> -Mo(1)-Cl(1)              | 180.0      |
| O(1)-C(3)                | 1 | O(1) <sup>1</sup> -Mo(1)-Cl(2) <sup>1</sup>  | 89.98(3)   |
| O(1)-C(1)                | 1 | O(1)-Mo(1)-Cl(2)                             | 89.98(3)   |
| C(3)-C(4)                | 1 | O(1) <sup>1</sup> -Mo(1)-Cl(2)               | 90.02(3)   |
| C(1)-C(2)                | 1 | O(1)-Mo(1)-Cl(2) <sup>1</sup>                | 90.02(3)   |
|                          |   | O(1)-Mo(1)-Cl(1) <sup>1</sup>                | 90.00(3)   |
|                          |   | O(1) <sup>1</sup> -Mo(1)-Cl(1)               | 90.00(3)   |
|                          |   | O(1)-Mo(1)-Cl(1)                             | 90.00(3)   |
|                          |   | O(1) <sup>1</sup> -Mo(1)-Cl(1) <sup>1</sup>  | 90.00(3)   |
|                          |   | O(1)-Mo(1)-O(1) <sup>1</sup>                 | 180.00(5)  |
|                          |   | C(3)-O(1)-Mo(1)                              | 123.31(9)  |
|                          |   | C(3)-O(1)-C(1)                               | 114.25(12) |
|                          |   | C(1)-O(1)-Mo(1)                              | 122.43(10) |
|                          |   | O(1)-C(3)-C(4)                               | 112.58(15) |
|                          |   | O(1)-C(3)-C(4)                               | 112.46(15) |

Symmetry transformations used to generate equivalent atoms: (1) <sup>1</sup>1-X,1-Y,1-Z



**Table S6.** Bond lengths [Å] and angles [°] for **2**.

|              |                     |            |
|--------------|---------------------|------------|
| Mo(1)- Cl(1) | 2 Cl(2)-Mo(1)-Cl(1) | 93.90(8)   |
| Mo(1)-Cl(2)  | 2 Cl(2)-Mo(1)-Cl(3) | 94.01(10)  |
| Mo(1)-Cl(3)  | 2 Cl(2)-Mo(1)-Cl(4) | 94.48(8)   |
| Mo(1)-Cl(4)  | 2 Cl(3)-Mo(1)-Cl(1) | 94.88(9)   |
| Mo(1)-O(1)   | 2 Cl(3)-Mo(1)-Cl(4) | 93.97(8)   |
| Mo(1)-O(2)   | 2 Cl(4)-Mo(1)-Cl(1) | 167.35(9)  |
| O(1)-C(1)    | 1 O(1)-Mo(1)-Cl(1)  | 85.99(17)  |
| O(1)-C(2)    | 1 O(1)-Mo(1)-Cl(2)  | 95.45(18)  |
| O(2)-C(3)    | 1 O(1)-Mo(1)-Cl(3)  | 170.42(17) |
| O(2)-C(4)    | 1 O(1)-Mo(1)-Cl(4)  | 83.80(17)  |
| C(2)-C(3)    | 1 O(2)-Mo(1)-Cl(1)  | 85.02(16)  |
|              | O(2)-Mo(1)-Cl(2)    | 172.28(18) |
|              | O(2)-Mo(1)-Cl(3)    | 93.70(16)  |
|              | O(2)-Mo(1)-Cl(4)    | 85.41(16)  |
|              | O(2)-Mo(1)-O(1)     | 76.9(2)    |
|              | C(1)-O(1)-Mo(1)     | 121.8(7)   |
|              | C(1)-O(1)-C(2)      | 111.0(8)   |
|              | C(2)-O(1)-Mo(1)     | 112.2(5)   |
|              | C(3)-O(2)-Mo(1)     | 112.1(5)   |
|              | C(4)-O(2)-Mo(1)     | 124.6(5)   |
|              | C(4)-O(2)-C(3)      | 111.6(7)   |
|              | O(1)-C(2)-C(3)      | 107.5(9)   |

|                |          |
|----------------|----------|
| O(2)-C(3)-C(2) | 106.9(8) |
|----------------|----------|

---

**Table S7.** Bond lengths [Å] and angles [°] for **4**.

|            |                    |            |
|------------|--------------------|------------|
| W(1)-Cl(1) | 2 Cl(2)-W(1)-Cl(1) | 93.57(6)   |
| W(1)-Cl(2) | 2 Cl(2)-W(1)-Cl(3) | 94.13(8)   |
| W(1)-Cl(3) | 2 Cl(2)-W(1)-Cl(4) | 93.36(6)   |
| W(1)-Cl(4) | 2 Cl(3)-W(1)-Cl(1) | 93.31(6)   |
| W(1)-O(1)  | 2 Cl(3)-W(1)-Cl(4) | 94.11(6)   |
| W(1)-O(2)  | 2 Cl(4)-W(1)-Cl(1) | 169.45(6)  |
| O(1)-C(1)  | 1 O(1)-W(1)-Cl(1)  | 84.40(13)  |
| O(1)-C(2)  | 1 O(1)-W(1)-Cl(2)  | 95.51(14)  |
| O(2)-C(3)  | 1 O(1)-W(1)-Cl(3)  | 170.20(13) |
| O(2)-C(4)  | 1 O(1)-W(1)-Cl(4)  | 87.03(13)  |
| C(2)-C(3)  | 1 O(2)-W(1)-Cl(1)  | 86.36(12)  |
|            | O(2)-W(1)-Cl(2)    | 172.01(13) |
|            | O(2)-W(1)-Cl(3)    | 93.85(12)  |
|            | O(2)-W(1)-Cl(4)    | 85.68(12)  |
|            | O(2)-W(1)-O(1)     | 76.52(17)  |
|            | C(1)-O(1)-W(1)     | 121.9(5)   |
|            | C(1)-O(1)-C(2)     | 111.3(6)   |
|            | C(2)-O(1)-W(1)     | 113.0(4)   |
|            | C(3)-O(2)-W(1)     | 113.0(4)   |
|            | C(4)-O(2)-W(1)     | 124.9(4)   |
|            | C(4)-O(2)-C(3)     | 110.8(5)   |
|            | O(1)-C(2)-C(3)     | 107.6(6)   |

O(2)-C(3)-C(2) 106.8(5)

**Table S8.** Anisotropic displacement parameters ( $\text{\AA}^2 \times 10^3$ ) for **1**. The anisotropic displacement factor exponent takes the form:  $-2p^2[ h^2 a^{*2}U^{11} + \dots + 2 h k a^* b^* U^{12} ]$

|     | $U_{11}$  | $U_{22}$  | $U_{33}$  | $U_{23}$  | $U_{13}$ | $U_{12}$  |
|-----|-----------|-----------|-----------|-----------|----------|-----------|
| Mo1 | 24.72(10) | 28.86(11) | 29.84(10) | 1.48(7)   | 9.86(7)  | -1.86(7)  |
| Cl2 | 61.6(3)   | 41.8(2)   | 42.0(2)   | 10.94(18) | 23.3(2)  | 1.8(2)    |
| Cl1 | 27.25(19) | 58.9(3)   | 55.8(3)   | -8.3(2)   | 6.34(17) | -4.51(18) |
| O1  | 33.1(6)   | 32.3(6)   | 43.1(6)   | -3.7(5)   | 18.2(5)  | -3.9(5)   |
| C3  | 42.5(9)   | 34.5(9)   | 49.2(10)  | -5.5(7)   | 12.7(8)  | -9.4(7)   |
| C1  | 36.3(8)   | 43.6(10)  | 51.4(10)  | -3.4(8)   | 23.0(8)  | 0.4(7)    |
| C2  | 72.0(14)  | 69.2(15)  | 47.8(11)  | -0.8(10)  | 29.7(10) | 3.5(11)   |
| C4  | 72.0(14)  | 37.9(11)  | 73.3(15)  | 5.1(10)   | 16.6(12) | 0.6(10)   |

**Table S9.** Anisotropic displacement parameters ( $\text{\AA}^2 \times 10^3$ ) for **2**. The anisotropic displacement factor exponent takes the form:  $-2p^2[ h^2 a^{*2}U^{11} + \dots + 2 h k a^* b^* U^{12} ]$

|     | $U_{11}$ | $U_{22}$ | $U_{33}$ | $U_{23}$ | $U_{13}$  | $U_{12}$ |
|-----|----------|----------|----------|----------|-----------|----------|
| Mo1 | 14.2(4)  | 15.3(3)  | 10.8(3)  | -1.5(3)  | -1.2(2)   | 4.6(3)   |
| Cl1 | 24.4(11) | 22.7(11) | 13.7(9)  | -6.3(7)  | -1.0(8)   | 6.1(8)   |
| Cl2 | 51.5(17) | 25.0(11) | 22.0(11) | -2.6(8)  | -10.0(11) | 23.5(11) |
| Cl3 | 12.8(11) | 41.8(13) | 25.4(11) | -4.5(9)  | 1.5(8)    | -3.0(9)  |
| Cl4 | 27.9(12) | 15.8(9)  | 11.8(9)  | -3.0(7)  | -0.7(8)   | 0.4(8)   |
| O1  | 25(4)    | 15(3)    | 19(3)    | 1(2)     | 8(3)      | 0(2)     |

|    |       |       |       |       |       |       |
|----|-------|-------|-------|-------|-------|-------|
| O2 | 8(3)  | 17(3) | 18(3) | 2(2)  | -2(2) | 1(2)  |
| C1 | 55(8) | 19(4) | 23(5) | 1(4)  | 12(5) | -7(5) |
| C2 | 20(6) | 22(4) | 29(6) | -1(3) | 2(5)  | -4(4) |
| C3 | 16(5) | 20(4) | 25(4) | -2(3) | -1(4) | -1(3) |
| C4 | 13(4) | 25(4) | 19(4) | 9(3)  | 4(3)  | 3(4)  |

**Table S10.** Anisotropic displacement parameters ( $\text{\AA}^2 \times 10^3$ ) for **4**. The anisotropic displacement factor exponent takes the form:  $-2\pi^2 [h^2 a^{*2} U^{11} + \dots + 2 h k a^* b^* U^{12}]$

|     | $U_{11}$  | $U_{22}$ | $U_{33}$ | $U_{23}$ | $U_{13}$ | $U_{12}$  |
|-----|-----------|----------|----------|----------|----------|-----------|
| W1  | 16.73(10) | 16.94(9) | 13.60(9) | 1.18(18) | -0.95(6) | -4.26(18) |
| Cl1 | 30.3(7)   | 17.9(6)  | 14.2(5)  | 2.2(4)   | 0.1(5)   | 0.0(5)    |
| Cl2 | 50.4(11)  | 28.8(8)  | 25.3(7)  | 2.0(6)   | -10.5(7) | -20.1(7)  |
| Cl3 | 15.8(6)   | 43.6(10) | 28.1(7)  | 2.5(7)   | 1.0(5)   | 3.1(6)    |
| Cl4 | 28.7(7)   | 25.4(7)  | 16.2(6)  | 5.5(5)   | -0.1(5)  | -6.4(5)   |
| O1  | 29(2)     | 17(2)    | 22(2)    | 1.5(16)  | 4.4(17)  | 4.1(17)   |
| O2  | 15.8(18)  | 20.4(19) | 18.2(19) | -1.2(15) | -2.0(14) | -2.5(15)  |
| C1  | 61(5)     | 23(3)    | 25(3)    | -3(2)    | 10(3)    | 6(3)      |
| C2  | 18(3)     | 25(3)    | 34(4)    | 1(2)     | 8(3)     | 3(2)      |
| C3  | 13(2)     | 27(3)    | 31(3)    | 0(2)     | -1(2)    | 1(2)      |
| C4  | 24(3)     | 26(3)    | 27(3)    | -9(2)    | 3(2)     | -2(2)     |

**Table S11.** Hydrogen coordinates ( $\times 10^4$ ) and isotropic displacement parameters ( $\text{\AA}^2 \times 10^3$ ) for **1**.

|     | <b>x</b> | <b>y</b> | <b>z</b> | <b>U(eq)</b> |
|-----|----------|----------|----------|--------------|
| H3A | 4321.09  | 2309.38  | 2520.41  | 51           |
| H3B | 3755.49  | 2524.35  | 4041.01  | 51           |
| H1A | 8094.04  | 3113.99  | 3419.05  | 50           |
| H1B | 7795.59  | 4466.16  | 3274.96  | 50           |
| H2A | 7433.3   | 3804.25  | 847.63   | 91           |
| H2B | 5455.18  | 4117.28  | 933.06   | 91           |
| H2C | 6098.1   | 2813.68  | 1049.87  | 91           |
| H4A | 7013.31  | 1444.42  | 3915.92  | 93           |
| H4B | 5353.13  | 809.79   | 4277.06  | 93           |
| H4C | 6530.01  | 1704.37  | 5462.45  | 93           |

**Table S12.** Hydrogen coordinates ( $\times 10^4$ ) and isotropic displacement parameters ( $\text{\AA}^2 \times 10^3$ ) for **2**.

|     | <b>x</b> | <b>y</b> | <b>z</b> | <b>U(eq)</b> |
|-----|----------|----------|----------|--------------|
| H1A | 3905.47  | 280.03   | 6454.99  | 48           |
| H1B | 1951.07  | 482.48   | 6315.54  | 48           |
| H1C | 3037.82  | 1379.67  | 7069.11  | 48           |
| H2A | 1890.14  | 2976.89  | 5894.23  | 28           |
| H2B | 903.64   | 2040.04  | 5110.94  | 28           |



|     |         |         |         |    |
|-----|---------|---------|---------|----|
| H3A | 2337.34 | 2666.16 | 3481.14 | 24 |
| H3B | 1563.78 | 3821.72 | 4073.64 | 24 |
| H4A | 5513.72 | 4868.62 | 3657.85 | 28 |
| H4B | 3584.11 | 5113.64 | 3435.55 | 28 |
| H4C | 4515.05 | 4104.18 | 2729.1  | 28 |

**Table S13.** Hydrogen coordinates ( $\times 10^4$ ) and isotropic displacement parameters ( $\text{\AA}^2 \times 10^3$ ) for **4**.

|     | <b>x</b> | <b>y</b> | <b>z</b> | <b>U(eq)</b> |
|-----|----------|----------|----------|--------------|
| H1A | 3189.63  | 5249.06  | 3416.85  | 54           |
| H1B | 5121.01  | 5563.42  | 3468.29  | 54           |
| H1C | 3873.37  | 6374.53  | 2743.18  | 54           |
| H2A | 5176.88  | 8003.08  | 3932.48  | 31           |
| H2B | 6144.57  | 7057.72  | 4715.46  | 31           |
| H3A | 4757.34  | 7694.5   | 6329.45  | 28           |
| H3B | 5493.74  | 8853.46  | 5725.19  | 28           |
| H4A | 1551.69  | 9869.68  | 6183.28  | 38           |
| H4B | 3483.9   | 10124.15 | 6376.29  | 38           |
| H4C | 2588.94  | 9110.84  | 7094.35  | 38           |

**Table S14.** Calculated raw and relative energetics for singlet and triplet states and *cis*- and *trans*-isomers of  $\text{MCl}_4(\text{dme})$ ,  $\text{MCl}_4(\text{OEt}_2)_2$ ,  $\text{MCl}_4(\text{OH}_2)_2$ ,  $\text{MCl}_4(\text{OMeH})_2$ , and  $\text{MCl}_4(\text{OMe}_2)_2$  ( $\text{M} = \text{Mo}, \text{W}$ ) using various model chemistries.

|                                                                            | UM06LGD3 | UM06LGD3     | UM06LGD3     | UBLYPGD3     | UPBEPBGD3    |
|----------------------------------------------------------------------------|----------|--------------|--------------|--------------|--------------|
|                                                                            | def2SVP  |              |              |              |              |
|                                                                            | ZPE      | def2SVP      | def2TZVP     | def2TZVP     | def2TZVP     |
| cis-MoCl <sub>4</sub> (OEt <sub>2</sub> ) <sub>2</sub> singlet             | 0.283088 | -2375.605890 | -2376.723854 |              |              |
| trans-MoCl <sub>4</sub> (OEt <sub>2</sub> ) <sub>2</sub> singlet           | 0.282835 | -2375.614719 | -2376.729782 |              |              |
| <b>trans-cis</b>                                                           |          | <b>-23.8</b> | <b>-16.2</b> |              |              |
| cis-MoCl <sub>4</sub> (OEt <sub>2</sub> ) <sub>2</sub> triplet             | 0.282907 | -2375.634708 | -2376.752406 | -2376.582072 | -2375.475688 |
| trans-MoCl <sub>4</sub> (OEt <sub>2</sub> ) <sub>2</sub> triplet           | 0.282905 | -2375.636427 | -2376.751935 | -2376.583381 | -2375.477317 |
| <b>trans-cis</b>                                                           |          | <b>-4.5</b>  | <b>1.2</b>   | <b>-3.4</b>  | <b>-4.3</b>  |
| cis-MoCl <sub>4</sub> (OEt <sub>2</sub> ) <sub>2</sub> triplet-singlet     |          | <b>-76.1</b> | <b>-75.4</b> |              |              |
| <b>trans-MoCl<sub>4</sub>(OEt<sub>2</sub>)<sub>2</sub> triplet-singlet</b> |          | <b>-56.8</b> | <b>-58.0</b> |              |              |
|                                                                            |          |              |              |              |              |
| cis-WCl <sub>4</sub> (OEt <sub>2</sub> ) <sub>2</sub> singlet              | 0.282911 | -2374.503687 | -2375.620340 |              |              |
| trans-WCl <sub>4</sub> (OEt <sub>2</sub> ) <sub>2</sub> singlet            | 0.282730 | -2374.513238 | -2375.628490 |              |              |
| <b>trans-cis</b>                                                           |          | <b>-25.6</b> | <b>-21.9</b> |              |              |
| cis-WCl <sub>4</sub> (OEt <sub>2</sub> ) <sub>2</sub> triplet              | 0.282496 | -2374.532100 | -2375.647992 | -2375.480577 | -2374.378452 |
| trans-WCl <sub>4</sub> (OEt <sub>2</sub> ) <sub>2</sub> triplet            | 0.282801 | -2374.533949 | -2375.650845 | -2375.485574 | -2374.382820 |
| <b>trans-cis</b>                                                           |          | <b>-4.1</b>  | <b>-6.7</b>  | <b>-12.3</b> | <b>-10.7</b> |
| cis-WCl <sub>4</sub> (OEt <sub>2</sub> ) <sub>2</sub> triplet-singlet      |          | <b>-75.7</b> | <b>-73.7</b> |              |              |
| <b>trans-WCl<sub>4</sub>(OEt<sub>2</sub>)<sub>2</sub> triplet-singlet</b>  |          | <b>-54.2</b> | <b>-58.5</b> |              |              |
|                                                                            |          |              |              |              |              |
| cis-MoCl <sub>4</sub> (OH <sub>2</sub> ) <sub>2</sub> triplet              | 0.055744 | -2061.440122 | -2062.218194 | -2062.182345 | -2061.355467 |
| trans-MoCl <sub>4</sub> (OH <sub>2</sub> ) <sub>2</sub> triplet            | 0.055913 | -2061.426606 | -2062.202040 | -2062.168078 | -2061.342290 |
| <b>trans-cis</b>                                                           |          | <b>35.9</b>  | <b>42.9</b>  | <b>37.9</b>  | <b>35.0</b>  |
| cis-MoCl <sub>4</sub> (OMeH) <sub>2</sub> triplet                          | 0.113127 | -2139.969970 | -2140.834850 | -2140.766433 | -2139.866828 |
| trans-MoCl <sub>4</sub> (OMeH) <sub>2</sub> triplet                        | 0.113094 | -2139.958971 | -2140.821034 | -2140.756115 | -2139.856581 |
| <b>trans-cis</b>                                                           |          | <b>28.8</b>  | <b>36.2</b>  | <b>27.0</b>  | <b>26.8</b>  |
| cis-MoCl <sub>4</sub> (OMe <sub>2</sub> ) <sub>2</sub> triplet             | 0.168829 | -2218.490765 | -2219.444000 | -2219.345869 | -2218.372938 |
| trans-MoCl <sub>4</sub> (OMe <sub>2</sub> ) <sub>2</sub> triplet           | 0.169374 | -2218.493268 | -2219.443174 | -2219.343831 | -2218.370612 |
| <b>trans-cis</b>                                                           |          | <b>-5.1</b>  | <b>3.6</b>   | <b>6.8</b>   | <b>7.5</b>   |
| cis-WCl <sub>4</sub> (OH <sub>2</sub> ) <sub>2</sub> triplet               | 0.055653 | -2060.335790 | -2061.112305 | -2061.076134 | -2060.255309 |
| trans-WCl <sub>4</sub> (OH <sub>2</sub> ) <sub>2</sub> triplet             | 0.055950 | -2060.324663 | -2061.100009 | -2061.063436 | -2060.244512 |
| <b>trans-cis</b>                                                           |          | <b>30.0</b>  | <b>33.1</b>  | <b>34.1</b>  | <b>29.1</b>  |
| cis-WCl <sub>4</sub> (OMeH) <sub>2</sub> triplet                           | 0.112867 | -2138.865911 | -2139.729295 | -2139.661744 | -2138.767539 |
| trans-WCl <sub>4</sub> (OMeH) <sub>2</sub> triplet                         | 0.113305 | -2138.856876 | -2139.718928 | -2139.653587 | -2138.759484 |
| <b>trans-cis</b>                                                           |          | <b>24.9</b>  | <b>28.4</b>  | <b>22.6</b>  | <b>22.3</b>  |
| cis-WCl <sub>4</sub> (OMe <sub>2</sub> ) <sub>2</sub> triplet              | 0.168913 | -2217.387307 | -2218.338798 | -2218.241509 | -2217.273527 |
| trans-WCl <sub>4</sub> (OMe <sub>2</sub> ) <sub>2</sub> triplet            | 0.168371 | -2217.391206 | -2218.341125 | -2218.243501 | -2217.274676 |
| <b>trans-cis</b>                                                           |          | <b>-11.7</b> | <b>-7.5</b>  | <b>-6.7</b>  | <b>-4.4</b>  |
|                                                                            |          |              |              |              |              |
| cis-MoCl <sub>4</sub> (dme) singlet                                        | 0.149374 | -2217.267752 | -2218.214865 | -2218.124509 | -2217.155175 |
| cis-MoCl <sub>4</sub> (dme) triplet                                        | 0.149304 | -2217.298296 | -2218.245647 | -2218.152852 | -2217.184918 |
| <b>cis-MoCl<sub>4</sub>(dme) triplet-singlet</b>                           |          | <b>-80.4</b> | <b>-81.0</b> | <b>-74.6</b> | <b>-78.3</b> |
| cis-WCl <sub>4</sub> (dme) singlet                                         | 0.149314 | -2216.164160 | -2217.109986 | -2217.023224 | -2216.058726 |
| cis-WCl <sub>4</sub> (dme) triplet                                         | 0.149121 | -2216.193821 | -2217.139654 | -2217.048318 | -2216.085523 |
| <b>cis-WCl<sub>4</sub>(dme) triplet-singlet</b>                            |          | <b>-78.4</b> | <b>-78.4</b> | <b>-66.4</b> | <b>-70.9</b> |
|                                                                            |          |              |              |              |              |

Table S14 (continued)

|                                                                                       | UM06LGD3 | UDLPNO-CCSD       | UDLPNO-CCSD(T)    | UDLPNO-CCSD  | UDLPNO-CCSD(T) |
|---------------------------------------------------------------------------------------|----------|-------------------|-------------------|--------------|----------------|
|                                                                                       | def2SVP  | //UM06LGD3        | //UM06LGD3        | //UPBEPBEGD3 | //UPBEPBEGD3   |
|                                                                                       | ZPE      | def2TZVP          | def2TZVP          | def2TZVP     | def2TZVP       |
| cis-MoCl <sub>4</sub> (OEt <sub>2</sub> ) <sub>2</sub> singlet                        | 0.283088 |                   |                   |              |                |
| trans-MoCl <sub>4</sub> (OEt <sub>2</sub> ) <sub>2</sub> singlet                      | 0.282835 |                   |                   |              |                |
| <b>trans-cis</b>                                                                      |          |                   |                   |              |                |
| cis-MoCl <sub>4</sub> (OEt <sub>2</sub> ) <sub>2</sub> triplet                        | 0.282907 | -2373.407334      |                   | -2373.380993 |                |
| trans-MoCl <sub>4</sub> (OEt <sub>2</sub> ) <sub>2</sub> triplet                      | 0.282905 | -2373.411236      |                   | -2373.385339 |                |
| <b>trans-cis</b>                                                                      |          | <b>-10.2</b>      |                   | <b>-11.4</b> |                |
|                                                                                       |          |                   |                   |              |                |
|                                                                                       |          |                   |                   |              |                |
|                                                                                       |          |                   |                   |              |                |
| cis-WCl <sub>4</sub> (OEt <sub>2</sub> ) <sub>2</sub> singlet                         | 0.282911 |                   |                   |              |                |
| trans-WCl <sub>4</sub> (OEt <sub>2</sub> ) <sub>2</sub> singlet                       | 0.282730 |                   |                   |              |                |
| <b>trans-cis</b>                                                                      |          |                   |                   |              |                |
| cis-WCl <sub>4</sub> (OEt <sub>2</sub> ) <sub>2</sub> triplet                         | 0.282496 | -2372.235362      | -2372.375267      | -2372.209300 | -2372.356153   |
| trans-WCl <sub>4</sub> (OEt <sub>2</sub> ) <sub>2</sub> triplet                       | 0.282801 | -2372.243178      | -2372.381900      | -2372.217104 | -2372.362674   |
| <b>trans-cis</b>                                                                      |          | <b>-19.7</b>      | <b>-16.6</b>      | <b>-19.7</b> | <b>-16.3</b>   |
|                                                                                       |          |                   |                   |              |                |
|                                                                                       |          |                   |                   |              |                |
|                                                                                       |          |                   |                   |              |                |
| cis-MoCl <sub>4</sub> (OH <sub>2</sub> ) <sub>2</sub> triplet                         | 0.055744 | -2059.641611      | -2059.726590      | -2059.620087 | -2059.709191   |
| trans-MoCl <sub>4</sub> (OH <sub>2</sub> ) <sub>2</sub> triplet                       | 0.055913 | -2059.625615      | -2059.710986      | -2059.603365 | -2059.692904   |
| <b>trans-cis</b>                                                                      |          | <b>42.4</b>       | <b>41.4</b>       | <b>44.3</b>  | <b>43.2</b>    |
| cis-MoCl <sub>4</sub> (OMeH) <sub>2</sub> triplet                                     | 0.113127 |                   |                   | -2138.042633 | -2138.148556   |
| trans-MoCl <sub>4</sub> (OMeH) <sub>2</sub> triplet                                   | 0.113094 |                   |                   | -2138.030995 | -2138.136830   |
| <b>trans-cis</b>                                                                      |          |                   |                   | <b>30.5</b>  | <b>30.7</b>    |
| cis-MoCl <sub>4</sub> (OMe <sub>2</sub> ) <sub>2</sub> triplet                        | 0.168829 | -2216.479684      | -2216.597744      | -2216.459132 | -2216.583015   |
| trans-MoCl <sub>4</sub> (OMe <sub>2</sub> ) <sub>2</sub> triplet                      | 0.169374 | -2216.484570      | -2216.602154      | -2216.460840 | -2216.583915   |
| <b>trans-cis</b>                                                                      |          | <b>-11.4</b>      | <b>-10.1</b>      | <b>-3.1</b>  | <b>-0.9</b>    |
| cis-WCl <sub>4</sub> (OH <sub>2</sub> ) <sub>2</sub> triplet                          | 0.055653 | -2058.466505      | -2058.542497      | -2058.444322 | -2058.524486   |
| trans-WCl <sub>4</sub> (OH <sub>2</sub> ) <sub>2</sub> triplet                        | 0.055950 | -2058.455058      | -2058.531321      | -2058.433621 | -2058.513963   |
| <b>trans-cis</b>                                                                      |          | <b>30.8</b>       | <b>30.1</b>       | <b>28.9</b>  | <b>28.4</b>    |
| cis-WCl <sub>4</sub> (OMeH) <sub>2</sub> triplet                                      | 0.112867 |                   |                   | -2136.868855 | -2136.965294   |
| trans-WCl <sub>4</sub> (OMeH) <sub>2</sub> triplet                                    | 0.113305 |                   |                   | -2136.861332 | -2136.957732   |
| <b>trans-cis</b>                                                                      |          |                   |                   | <b>20.9</b>  | <b>21.0</b>    |
| cis-WCl <sub>4</sub> (OMe <sub>2</sub> ) <sub>2</sub> triplet                         | 0.168913 | -2215.306710      | -2215.415517      | -2215.284855 | -2215.399674   |
| trans-WCl <sub>4</sub> (OMe <sub>2</sub> ) <sub>2</sub> triplet                       | 0.168371 | -2215.315144      | -2215.423420      | -2215.291670 | -2215.405340   |
| <b>trans-cis</b>                                                                      |          | <b>-23.6</b>      | <b>-22.2</b>      | <b>-19.3</b> | <b>-16.3</b>   |
|                                                                                       |          |                   |                   |              |                |
|                                                                                       |          | <b>UPBEPBEGD3</b> |                   |              |                |
|                                                                                       |          | <b>def2TZVP</b>   | <b>UPBEPBEGD3</b> |              |                |
|                                                                                       |          | <b>ZPE</b>        | <b>def2TZVP</b>   |              |                |
| cis-MoCl <sub>4</sub> (OH <sub>2</sub> ) <sub>2</sub> triplet flat H <sub>2</sub> O   |          | 0.052009          | -2061.347649      |              |                |
| trans-MoCl <sub>4</sub> (OH <sub>2</sub> ) <sub>2</sub> triplet flat H <sub>2</sub> O |          | 0.052412          | -2061.336255      |              |                |
| <b>trans-cis</b>                                                                      |          | <b>1.1</b>        | <b>31.0</b>       |              |                |
|                                                                                       |          |                   |                   |              |                |
| cis-WCl <sub>4</sub> (OH <sub>2</sub> ) <sub>2</sub> triplet flat H <sub>2</sub> O    |          | 0.051850          | -2060.247263      |              |                |
| trans-WCl <sub>4</sub> (OH <sub>2</sub> ) <sub>2</sub> triplet flat H <sub>2</sub> O  |          | 0.051409          | -2060.234592      |              |                |
| <b>trans-cis</b>                                                                      |          | <b>-1.2</b>       | <b>32.1</b>       |              |                |

**Table S15.** Experimental and calculated bond distances (pm) for  $\text{MCl}_4(\text{dme})$  and *cis*- and *trans*- $\text{MCl}_4(\text{ORR}')_2$  (M = Mo, W; R, R' = H, Me, Et) using various DFT models and the def2-TZVP basis set. The ether ligands are considered to be in the equatorial plane, so  $\text{Cl}_{\text{eq}}$  atoms are *trans* to ether O atoms, while  $\text{Cl}_{\text{ax}}$  atoms are *cis* to ether O atoms. Values are averaged for bonds of the same type.

|                                                                   |                     | Expt  | UM06L+GD3 | UBLYP+GD3 | UPBEPBE+GD3 |
|-------------------------------------------------------------------|---------------------|-------|-----------|-----------|-------------|
| <b>MoCl<sub>4</sub>(dme)</b>                                      | Mo–Cl <sub>eq</sub> | 230.6 | 228.5     | 231.2     | 228.5       |
|                                                                   | Mo–Cl <sub>ax</sub> | 233.2 | 233.4     | 236.1     | 233.4       |
|                                                                   | Mo–O                | 215.9 | 232.4     | 236.0     | 232.6       |
| <b>WCl<sub>4</sub>(dme)</b>                                       | W–Cl <sub>eq</sub>  | 231.9 | 230.3     | 233.1     | 230.5       |
|                                                                   | W–Cl <sub>ax</sub>  | 233.9 | 234.8     | 237.7     | 234.9       |
|                                                                   | W–O                 | 214.7 | 231.1     | 233.0     | 230.3       |
| <b><i>cis</i>–MoCl<sub>4</sub>(OEt<sub>2</sub>)<sub>2</sub></b>   | Mo–Cl <sub>eq</sub> |       | 229.2     | 231.8     | 229.1       |
|                                                                   | Mo–Cl <sub>ax</sub> |       | 233.7     | 236.4     | 233.7       |
|                                                                   | Mo–O                |       | 233.3     | 237.4     | 233.9       |
| <b><i>trans</i>–MoCl<sub>4</sub>(OEt<sub>2</sub>)<sub>2</sub></b> | Mo–Cl               | 235.5 | 237.7     | 240.5     | 237.5       |
|                                                                   | Mo–O                | 206.7 | 210.0     | 212.7     | 210.3       |
|                                                                   |                     |       |           |           |             |
| <b><i>cis</i>–WCl<sub>4</sub>(OEt<sub>2</sub>)<sub>2</sub></b>    | W–Cl <sub>eq</sub>  |       | 231.0     | 233.8     | 231.1       |
|                                                                   | W–Cl <sub>ax</sub>  |       | 235.7     | 238.6     | 235.9       |
|                                                                   | W–O                 |       | 230.6     | 232.8     | 229.9       |
| <b><i>trans</i>–WCl<sub>4</sub>(OEt<sub>2</sub>)<sub>2</sub></b>  | W–Cl                | 235.7 | 236.8     | 239.5     | 236.8       |
|                                                                   | W–O                 | 207.0 | 218.3     | 220.5     | 218.0       |
|                                                                   |                     |       |           |           |             |
| <b><i>cis</i>–MoCl<sub>4</sub>(OH<sub>2</sub>)<sub>2</sub></b>    | Mo–Cl <sub>eq</sub> |       |           |           | 229.1       |
|                                                                   | Mo–Cl <sub>ax</sub> |       |           |           | 232.1       |
|                                                                   | Mo–O                |       |           |           | 231.2       |
| <b><i>trans</i>–MoCl<sub>4</sub>(OH<sub>2</sub>)<sub>2</sub></b>  | Mo–Cl               |       |           |           | 234.6       |
|                                                                   | Mo–O                |       |           |           | 219.2       |
|                                                                   |                     |       |           |           |             |
| <b><i>cis</i>–WCl<sub>4</sub>(OH<sub>2</sub>)<sub>2</sub></b>     | W–Cl <sub>eq</sub>  |       |           |           | 230.9       |
|                                                                   | W–Cl <sub>ax</sub>  |       |           |           | 233.6       |
|                                                                   | W–O                 |       |           |           | 231.5       |
| <b><i>trans</i>–WCl<sub>4</sub>(OH<sub>2</sub>)<sub>2</sub></b>   | W–Cl                |       |           |           | 235.8       |
|                                                                   | W–O                 |       |           |           | 219.7       |
|                                                                   |                     |       |           |           |             |
| <b><i>cis</i>–MoCl<sub>4</sub>(OMeH)<sub>2</sub></b>              | Mo–Cl <sub>eq</sub> |       |           |           | 229.0       |
|                                                                   | Mo–Cl <sub>ax</sub> |       |           |           | 233.2       |
|                                                                   | Mo–O                |       |           |           | 230.2       |
| <b><i>trans</i>–MoCl<sub>4</sub>(OMeH)<sub>2</sub></b>            | Mo–Cl               |       |           |           | 235.0       |
|                                                                   | Mo–O                |       |           |           | 217.4       |
|                                                                   |                     |       |           |           |             |
| <b><i>cis</i>–WCl<sub>4</sub>(OMeH)<sub>2</sub></b>               | W–Cl <sub>eq</sub>  |       |           |           | 230.8       |
|                                                                   | W–Cl <sub>ax</sub>  |       |           |           | 234.6       |
|                                                                   | W–O                 |       |           |           | 229.6       |
| <b><i>trans</i>–WCl<sub>4</sub>(OMeH)<sub>2</sub></b>             | W–Cl                |       |           |           | 236.3       |
|                                                                   | W–O                 |       |           |           | 217.8       |
|                                                                   |                     |       |           |           |             |
| <b><i>cis</i>–MoCl<sub>4</sub>(OMe<sub>2</sub>)<sub>2</sub></b>   | Mo–Cl <sub>eq</sub> |       |           |           | 228.5       |
|                                                                   | Mo–Cl <sub>ax</sub> |       |           |           | 232.2       |
|                                                                   | Mo–O                |       |           |           | 239.5       |
| <b><i>trans</i>–MoCl<sub>4</sub>(OMe<sub>2</sub>)<sub>2</sub></b> | Mo–Cl               |       |           |           | 235.3       |
|                                                                   | Mo–O                |       |           |           | 218.5       |
|                                                                   |                     |       |           |           |             |
| <b><i>cis</i>–WCl<sub>4</sub>(OMe<sub>2</sub>)<sub>2</sub></b>    | W–Cl <sub>eq</sub>  |       |           |           | 230.4       |
|                                                                   | W–Cl <sub>ax</sub>  |       |           |           | 234.0       |
|                                                                   | W–O                 |       |           |           | 236.9       |
| <b><i>trans</i>–WCl<sub>4</sub>(OMe<sub>2</sub>)<sub>2</sub></b>  | W–Cl                |       |           |           | 236.5       |
|                                                                   | W–O                 |       |           |           | 218.7       |
|                                                                   |                     |       |           |           |             |

**Table S16.** Calculated (TD, nm) electronic transition energies for  $\text{MCl}_4(\text{dme})$  and  $\text{trans-MCl}_4(\text{OEt}_2)_2$  ( $\text{M} = \text{Mo}, \text{W}$ ) using various model chemistries. Band positions are generally approximated within 10 nm, owing to a choice of a peak width at half height = 30 nm.

|                                                                        | Exp        | UCAM-B3LYP | UωB97XD  | UM06LHF | ULC-BLYP | ULC-M06L |
|------------------------------------------------------------------------|------------|------------|----------|---------|----------|----------|
| <b>MoCl<sub>4</sub>(dme)</b>                                           | 410 (sh)   | 490        | 510      | 460     | 480      | 430      |
|                                                                        | 360 (sh)   | 390 (sh)   | 400 (sh) | 325     | 390      | 370      |
|                                                                        | 310        | 360        | 360      |         | 310 (sh) | 310 (sh) |
|                                                                        |            |            |          |         |          |          |
| <b>MoCl<sub>4</sub>(dme)<br/>toluene</b>                               |            |            |          |         | 460      | 410      |
|                                                                        |            |            |          |         | 380 (sh) | 365 (sh) |
|                                                                        |            |            |          |         | 320      | 320 (sh) |
|                                                                        |            |            |          |         |          |          |
|                                                                        |            |            |          |         |          |          |
| <b>WCl<sub>4</sub>(dme)</b>                                            | 400 (sh) ? | 450        | 460      | 600     | 440      | 405      |
|                                                                        | 320 (sh)   | 380        | 390      | 420     | 370      | 355      |
|                                                                        |            |            |          |         |          |          |
| <b>WCl<sub>4</sub>(dme)<br/>toluene</b>                                |            |            |          |         | 425      | 390      |
|                                                                        |            |            |          |         | 360      | 350      |
|                                                                        |            |            |          |         |          |          |
|                                                                        |            |            |          |         |          |          |
| <b>trans-MoCl<sub>4</sub>(OEt<sub>2</sub>)<sub>2</sub></b>             | 550 (sh) ? | 440 (sh)   | 450 (sh) | 380     | 360 (sh) | 350 (sh) |
|                                                                        | 365        | 400        | 410      | 320     | 310 (sh) |          |
|                                                                        |            | 325        | 330      |         |          |          |
|                                                                        |            |            |          |         |          |          |
| <b>trans-MoCl<sub>4</sub>(OEt<sub>2</sub>)<sub>2</sub><br/>toluene</b> |            |            |          |         | 360 (sh) | 340 (sh) |
|                                                                        |            |            |          |         | 310 (sh) | 305 (sh) |
|                                                                        |            |            |          |         |          |          |
|                                                                        |            |            |          |         |          |          |
| <b>trans-WCl<sub>4</sub>(OEt<sub>2</sub>)<sub>2</sub></b>              | 660        |            |          |         |          |          |
|                                                                        | 480 (sh)   |            |          |         |          |          |
|                                                                        | 380 (sh)   | 340        | 340      | 310     | < 300    | <300     |
|                                                                        |            |            |          |         |          |          |
| <b>trans-WCl<sub>4</sub>(OEt<sub>2</sub>)<sub>2</sub><br/>toluene</b>  |            |            |          |         | < 300    | < 300    |
|                                                                        |            |            |          |         |          |          |

**Table S17.** Calculated (TD-ULC-M06L/def2TZVP, SCRF=toluene, nm) electronic transition wavelengths for  $\text{MCl}_4(\text{dme})$  and  $\text{trans-MCl}_4(\text{OEt}_2)_2$  (M = Mo, W).

| <i>trans</i> - $\text{MoCl}_4(\text{OEt}_2)_2$ $\text{C}_{2h}$ |           |           | <i>trans</i> - $\text{WCl}_4(\text{OEt}_2)_2$ $\text{C}_{2h}$ |           |           |
|----------------------------------------------------------------|-----------|-----------|---------------------------------------------------------------|-----------|-----------|
| Sym                                                            | $\lambda$ | Intensity | Sym                                                           | $\lambda$ | Intensity |
| BG                                                             | 7311.97   | 0.00000   |                                                               |           |           |
| AG                                                             | 1797.09   | 0.00000   | BG                                                            | 2974.58   | 0.00000   |
| AG                                                             | 375.27    | 0.00000   | BG                                                            | 393.78    | 0.00000   |
| AG                                                             | 367.65    | 0.00000   | BG                                                            | 361.36    | 0.00000   |
| BG                                                             | 366.30    | 0.00000   | BG                                                            | 327.65    | 0.00000   |
| BG                                                             | 363.55    | 0.00000   | AG                                                            | 317.79    | 0.00000   |
| AU                                                             | 341.43    | 0.00460   | BG                                                            | 306.85    | 0.00000   |
| AU                                                             | 337.37    | 0.00180   | BU                                                            | 290.03    | 0.02410   |
| BG                                                             | 313.72    | 0.00000   | BU                                                            | 288.99    | 0.02770   |
| BG                                                             | 309.76    | 0.00000   | AU                                                            | 256.08    | 0.00000   |
| BU                                                             | 305.05    | 0.00930   | AG                                                            | 254.31    | 0.00000   |
| AG                                                             | 304.48    | 0.00000   | BG                                                            | 247.61    | 0.00000   |
| BG                                                             | 294.51    | 0.00000   | BU                                                            | 240.46    | 0.02010   |
| AU                                                             | 291.07    | 0.00020   | AU                                                            | 239.61    | 0.00000   |
| AU                                                             | 284.91    | 0.00200   | BU                                                            | 238.55    | 0.03940   |
| BU                                                             | 284.49    | 0.00190   | BG                                                            | 238.24    | 0.00000   |
| AU                                                             | 278.28    | 0.01330   | BU                                                            | 234.99    | 0.03150   |
| AG                                                             | 274.90    | 0.00000   | AU                                                            | 232.50    | 0.00000   |
| AU                                                             | 272.90    | 0.00120   | BU                                                            | 229.87    | 0.01690   |
| AG                                                             | 271.37    | 0.00000   | BG                                                            | 229.41    | 0.00000   |
| AU                                                             | 270.96    | 0.02720   | BG                                                            | 225.34    | 0.00000   |
| AU                                                             | 266.58    | 0.00000   | AU                                                            | 222.59    | 0.00000   |
| BU                                                             | 264.91    | 0.02160   | AU                                                            | 220.21    | 0.00440   |
| BU                                                             | 256.41    | 0.00760   | BG                                                            | 216.61    | 0.00000   |
| BU                                                             | 252.22    | 0.07580   | AU                                                            | 215.76    | 0.00010   |
|                                                                |           |           |                                                               |           |           |
| $\text{MoCl}_4(\text{dme})$ $\text{C}_2$                       |           |           | $\text{WCl}_4(\text{dme})$ $\text{C}_2$                       |           |           |
| Sym                                                            | $\lambda$ | Intensity | Sym                                                           | $\lambda$ | Intensity |
| B                                                              | 2995.65   | 0.00060   | B                                                             | 4665.44   | 0.00040   |
| B                                                              | 2252.77   | 0.00020   | B                                                             | 2465.61   | 0.00010   |
| A                                                              | 434.34    | 0.00000   | A                                                             | 408.85    | 0.00000   |
| B                                                              | 428.99    | 0.00030   | B                                                             | 393.91    | 0.00130   |
| B                                                              | 411.13    | 0.00240   | B                                                             | 385.20    | 0.00240   |
| A                                                              | 365.57    | 0.00290   | A                                                             | 344.52    | 0.00340   |
| A                                                              | 327.22    | 0.00510   | A                                                             | 268.81    | 0.00550   |
| B                                                              | 318.60    | 0.00280   | B                                                             | 264.89    | 0.00260   |
| B                                                              | 302.97    | 0.02410   | A                                                             | 254.52    | 0.00010   |
| A                                                              | 301.63    | 0.00000   | B                                                             | 249.82    | 0.02490   |
| A                                                              | 289.52    | 0.00000   | A                                                             | 240.24    | 0.00170   |
| A                                                              | 282.40    | 0.00000   | A                                                             | 238.65    | 0.00030   |
| B                                                              | 277.50    | 0.00870   | A                                                             | 238.02    | 0.00030   |
| A                                                              | 277.42    | 0.00030   | B                                                             | 237.23    | 0.00550   |
| A                                                              | 271.76    | 0.02280   | A                                                             | 230.19    | 0.03070   |
| A                                                              | 254.39    | 0.00000   | B                                                             | 224.02    | 0.05640   |
| B                                                              | 254.19    | 0.03870   | A                                                             | 223.57    | 0.00000   |
| A                                                              | 250.84    | 0.00010   | B                                                             | 216.93    | 0.00280   |
| B                                                              | 247.99    | 0.02930   | A                                                             | 216.30    | 0.00020   |
| B                                                              | 246.52    | 0.00120   | B                                                             | 214.85    | 0.00140   |
| A                                                              | 242.48    | 0.00210   | A                                                             | 210.58    | 0.00740   |
| B                                                              | 242.47    | 0.03060   | B                                                             | 210.47    | 0.06920   |
| A                                                              | 240.39    | 0.00020   | B                                                             | 208.27    | 0.00890   |
| B                                                              | 239.67    | 0.00200   | A                                                             | 207.88    | 0.00090   |
| B                                                              | 237.06    | 0.01740   | B                                                             | 205.03    | 0.01330   |

**Table S18.** Optimized Cartesian coordinates (UM06L+GD3/def2-TZVP) for all triplet  $\text{MCl}_4\text{L}_2$  complex molecules examined (M = Mo, W).

| <b>MoCl<sub>4</sub>(dme)</b>                                    |           |           |           | <b>WCl<sub>4</sub>(dme)</b>                                    |           |           |           |
|-----------------------------------------------------------------|-----------|-----------|-----------|----------------------------------------------------------------|-----------|-----------|-----------|
| Mo                                                              | 0.061797  | -0.000277 | 0.000035  | W                                                              | 0.050215  | -0.000226 | 0.000030  |
| Cl                                                              | -0.431910 | -0.789709 | 2.140184  | Cl                                                             | -0.438216 | -0.790246 | 2.156657  |
| Cl                                                              | 1.591360  | 1.587289  | 0.602646  | Cl                                                             | 1.609406  | 1.586766  | 0.596664  |
| Cl                                                              | 1.577774  | -1.601476 | -0.600832 | Cl                                                             | 1.595792  | -1.601163 | -0.594766 |
| Cl                                                              | -0.422372 | 0.793533  | -2.140673 | Cl                                                             | -0.428546 | 0.794139  | -2.157170 |
| O                                                               | -1.792102 | 1.316101  | 0.482544  | O                                                              | -1.791981 | 1.312649  | 0.474083  |
| C                                                               | -1.715276 | 2.732059  | 0.296727  | C                                                              | -1.711724 | 2.732101  | 0.296000  |
| H                                                               | -0.818157 | 3.068799  | 0.806657  | H                                                              | -0.808097 | 3.060767  | 0.799797  |
| H                                                               | -2.597444 | 3.200086  | 0.735880  | H                                                              | -2.588430 | 3.198663  | 0.746556  |
| H                                                               | -1.647581 | 2.971757  | -0.766526 | H                                                              | -1.652138 | 2.975157  | -0.766671 |
| C                                                               | -2.963659 | 0.754058  | -0.118079 | C                                                              | -2.972087 | 0.754336  | -0.118486 |
| H                                                               | -2.966479 | 0.986970  | -1.187649 | H                                                              | -2.979801 | 0.988289  | -1.187629 |
| H                                                               | -3.847878 | 1.201474  | 0.344555  | H                                                              | -3.850227 | 1.204413  | 0.352053  |
| C                                                               | -2.970425 | -0.727493 | 0.114683  | C                                                              | -2.978882 | -0.727605 | 0.114964  |
| O                                                               | -1.803259 | -1.300006 | -0.484602 | O                                                              | -1.803138 | -1.296501 | -0.476211 |
| C                                                               | -1.739327 | -2.716594 | -0.298704 | C                                                              | -1.735847 | -2.716616 | -0.298041 |
| H                                                               | -0.844675 | -3.061355 | -0.807609 | H                                                              | -0.834613 | -3.053388 | -0.800770 |
| H                                                               | -2.625146 | -3.176706 | -0.738870 | H                                                              | -2.616174 | -3.175285 | -0.749637 |
| H                                                               | -1.674997 | -2.956883 | 0.764625  | H                                                              | -1.679705 | -2.960191 | 0.764699  |
| H                                                               | -2.976555 | -0.960366 | 1.184247  | H                                                              | -2.989963 | -0.961474 | 1.184095  |
| H                                                               | -3.858083 | -1.166978 | -0.348966 | H                                                              | -3.860472 | -1.169778 | -0.356618 |
| <b><i>cis</i>-MoCl<sub>4</sub>(OEt<sub>2</sub>)<sub>2</sub></b> |           |           |           | <b><i>cis</i>-WCl<sub>4</sub>(OEt<sub>2</sub>)<sub>2</sub></b> |           |           |           |
| Mo                                                              | 0.000855  | -0.024742 | 0.043954  | W                                                              | 0.046336  | -0.661191 | -0.106524 |
| O                                                               | 1.300491  | 1.946623  | 0.024944  | O                                                              | 1.909015  | 0.546950  | 0.621993  |
| C                                                               | 1.956523  | 2.366967  | 1.248771  | C                                                              | 2.602555  | 0.140159  | 1.831971  |
| C                                                               | 1.310129  | 3.612186  | 1.787338  | C                                                              | 2.334338  | 1.121941  | 2.936941  |
| H                                                               | 1.811518  | 3.933436  | 2.699388  | H                                                              | 2.858467  | 0.822864  | 3.843626  |
| H                                                               | 1.363495  | 4.433423  | 1.072240  | H                                                              | 2.671631  | 2.124501  | 2.672663  |
| H                                                               | 0.263855  | 3.425052  | 2.023671  | H                                                              | 1.268761  | 1.160011  | 3.158869  |
| H                                                               | 3.015838  | 2.516022  | 1.029638  | H                                                              | 3.666098  | 0.062103  | 1.597926  |
| H                                                               | 1.884521  | 1.535157  | 1.944768  | H                                                              | 2.248521  | -0.858590 | 2.074866  |
| C                                                               | 1.947477  | 2.511087  | -1.138727 | C                                                              | 2.760424  | 1.346221  | -0.235777 |
| C                                                               | 3.171759  | 1.739036  | -1.546267 | C                                                              | 3.674859  | 0.502052  | -1.078216 |
| H                                                               | 2.911269  | 0.716159  | -1.809802 | H                                                              | 3.100690  | -0.139138 | -1.743804 |
| H                                                               | 3.632371  | 2.210855  | -2.413438 | H                                                              | 4.311771  | 1.144396  | -1.685226 |
| H                                                               | 3.915611  | 1.706777  | -0.751174 | H                                                              | 4.321099  | -0.129374 | -0.469697 |
| H                                                               | 2.179427  | 3.554082  | -0.904159 | H                                                              | 3.311802  | 2.033321  | 0.412096  |
| H                                                               | 1.203206  | 2.510327  | -1.932221 | H                                                              | 2.094078  | 1.939300  | -0.858442 |
| O                                                               | -1.922934 | 1.165321  | -0.393355 | O                                                              | -1.299269 | 1.117534  | 0.337762  |
| C                                                               | -1.877659 | 2.412693  | -1.102471 | C                                                              | -0.845448 | 2.475863  | 0.189773  |
| C                                                               | -2.810065 | 2.443777  | -2.282920 | C                                                              | -1.684512 | 3.264679  | -0.777316 |
| H                                                               | -2.614736 | 1.603656  | -2.947212 | H                                                              | -1.744440 | 2.752937  | -1.736380 |
| H                                                               | -3.856989 | 2.412754  | -1.983671 | H                                                              | -2.695066 | 3.432544  | -0.407406 |
| H                                                               | -2.659798 | 3.364939  | -2.843776 | H                                                              | -1.231470 | 4.241481  | -0.939101 |
| H                                                               | -2.076074 | 3.226225  | -0.398212 | H                                                              | -0.807333 | 2.938707  | 1.179714  |
| H                                                               | -0.842778 | 2.511223  | -1.422878 | H                                                              | 0.178284  | 2.386635  | -0.165725 |
| C                                                               | -3.193090 | 0.833140  | 0.211019  | C                                                              | -2.634138 | 0.959323  | 0.881208  |
| C                                                               | -3.745396 | 1.921537  | 1.091183  | C                                                              | -2.811662 | 1.641267  | 2.209452  |
| H                                                               | -4.618744 | 1.539501  | 1.617279  | H                                                              | -3.775130 | 1.354557  | 2.627495  |
| H                                                               | -3.013555 | 2.228851  | 1.836682  | H                                                              | -2.037444 | 1.330768  | 2.909855  |
| H                                                               | -4.065884 | 2.799104  | 0.530582  | H                                                              | -2.803599 | 2.728119  | 2.134135  |
| H                                                               | -2.991373 | -0.068918 | 0.783022  | H                                                              | -2.763121 | -0.116020 | 0.968423  |
| H                                                               | -3.887120 | 0.563975  | -0.589884 | H                                                              | -3.345497 | 1.315820  | 0.132450  |
| Cl                                                              | -1.245803 | -1.951857 | 0.050798  | Cl                                                             | -1.809428 | -1.838396 | -0.852936 |



**Table S18.** (continued)

|    |           |           |           |
|----|-----------|-----------|-----------|
| Cl | 0.171163  | 0.124824  | -2.277632 |
| Cl | 1.966542  | -1.091130 | 0.527194  |
| Cl | -0.568414 | 0.682423  | 2.201181  |

***trans*-MoCl<sub>4</sub>(OEt<sub>2</sub>)<sub>2</sub>**

|    |           |           |           |
|----|-----------|-----------|-----------|
| Mo | 0.000000  | 0.000000  | -0.000000 |
| Cl | -0.788470 | 1.528795  | 1.653465  |
| Cl | -2.004446 | 0.264926  | -1.231559 |
| O  | -0.862822 | -1.593158 | 1.061590  |
| C  | -0.230995 | -2.906240 | 1.154668  |
| H  | -0.234905 | -3.186121 | 2.209203  |
| H  | 0.800064  | -2.737812 | 0.853668  |
| C  | -0.923378 | -3.908969 | 0.277562  |
| H  | -0.950089 | -3.560404 | -0.752985 |
| H  | -1.939219 | -4.121249 | 0.606887  |
| H  | -0.368953 | -4.845740 | 0.304386  |
| C  | -2.138637 | -1.469169 | 1.760858  |
| H  | -2.748642 | -2.322850 | 1.461664  |
| H  | -2.591497 | -0.569979 | 1.350457  |
| C  | -1.940821 | -1.379634 | 3.246463  |
| H  | -1.537150 | -2.297694 | 3.670333  |
| H  | -2.903229 | -1.196183 | 3.721610  |
| H  | -1.277679 | -0.553060 | 3.493965  |
| Cl | 0.788470  | -1.528795 | -1.653465 |
| Cl | 2.004446  | -0.264926 | 1.231559  |
| O  | 0.862822  | 1.593158  | -1.061590 |
| C  | 0.230995  | 2.906240  | -1.154668 |
| H  | 0.234905  | 3.186121  | -2.209203 |
| H  | -0.800064 | 2.737812  | -0.853668 |
| C  | 0.923378  | 3.908969  | -0.277562 |
| H  | 0.950089  | 3.560404  | 0.752985  |
| H  | 1.939219  | 4.121249  | -0.606887 |
| H  | 0.368953  | 4.845740  | -0.304386 |
| C  | 2.138637  | 1.469169  | -1.760858 |
| H  | 2.748642  | 2.322850  | -1.461664 |
| H  | 2.591497  | 0.569979  | -1.350457 |
| C  | 1.940821  | 1.379634  | -3.246463 |
| H  | 1.537150  | 2.297694  | -3.670333 |
| H  | 2.903229  | 1.196183  | -3.721610 |
| H  | 1.277679  | 0.553060  | -3.493965 |

***cis*-MoCl<sub>4</sub>(OH<sub>2</sub>)<sub>2</sub>**

|    |           |           |           |
|----|-----------|-----------|-----------|
| Mo | 0.000009  | 0.000006  | 0.012964  |
| Cl | 0.261666  | -1.677108 | 1.551462  |
| Cl | 2.194401  | 0.340608  | -0.662591 |
| Cl | -0.259425 | 1.678464  | 1.550371  |
| Cl | -2.195356 | -0.341186 | -0.659121 |
| O  | -0.259717 | 1.663800  | -1.569404 |
| H  | -1.112612 | 2.097871  | -1.437600 |
| H  | 0.420869  | 2.336729  | -1.438325 |
| O  | 0.257450  | -1.665172 | -1.568322 |
| H  | 1.110534  | -2.099129 | -1.437371 |
| H  | -0.422945 | -2.337986 | -1.435671 |

***trans*-MoCl<sub>4</sub>(OH<sub>2</sub>)<sub>2</sub>**

|    |           |          |          |
|----|-----------|----------|----------|
| Mo | -0.000000 | 0.000000 | 0.000000 |
|----|-----------|----------|----------|

|    |           |           |           |
|----|-----------|-----------|-----------|
| Cl | 0.323489  | 0.480025  | -2.145298 |
| Cl | 1.512471  | -2.402792 | -0.430396 |
| Cl | -0.364600 | -1.011609 | 2.190971  |

***trans*-WCl<sub>4</sub>(OEt<sub>2</sub>)<sub>2</sub>**

|    |           |           |           |
|----|-----------|-----------|-----------|
| W  | 0.000000  | 0.000000  | -0.000000 |
| Cl | 0.852708  | 1.527254  | -1.602440 |
| Cl | -1.985693 | -0.227891 | -1.261898 |
| O  | 0.892513  | -1.657770 | -1.105054 |
| C  | 0.274472  | -2.968635 | -1.180724 |
| H  | 0.310839  | -3.287445 | -2.224475 |
| H  | -0.769673 | -2.804707 | -0.922117 |
| C  | 0.937781  | -3.948995 | -0.255293 |
| H  | 1.975249  | -4.137740 | -0.527351 |
| H  | 0.410618  | -4.901016 | -0.298815 |
| H  | 0.904924  | -3.588663 | 0.770940  |
| C  | 2.149189  | -1.533118 | -1.820103 |
| H  | 2.754922  | -2.406956 | -1.571360 |
| H  | 2.635479  | -0.660877 | -1.388009 |
| C  | 1.933295  | -1.383793 | 3.299494  |
| H  | 2.893359  | -1.235853 | -3.791964 |
| H  | 1.306694  | -0.519237 | -3.509228 |
| H  | 1.472425  | -2.266032 | -3.741345 |
| Cl | -0.852708 | -1.527254 | 1.602440  |
| Cl | 1.985693  | 0.227891  | 1.261898  |
| O  | -0.892513 | 1.657770  | 1.105054  |
| C  | -0.274472 | 2.968635  | 1.180724  |
| H  | -0.310839 | 3.287445  | 2.224475  |
| H  | 0.769673  | 2.804707  | 0.922117  |
| C  | -0.937781 | 3.948995  | 0.255293  |
| H  | -1.975249 | 4.137740  | 0.527351  |
| H  | -0.410618 | 4.901016  | 0.298815  |
| H  | -0.904924 | 3.588663  | -0.770940 |
| C  | -2.149189 | 1.533118  | 1.820103  |
| H  | -2.754922 | 2.406956  | 1.571360  |
| H  | -2.635479 | 0.660877  | 1.388009  |
| C  | -1.933295 | 1.383793  | 3.299494  |
| H  | -2.893359 | 1.235853  | 3.791964  |
| H  | -1.306694 | 0.519237  | 3.509228  |
| H  | -1.472425 | 2.266032  | 3.741345  |

***cis*-WCl<sub>4</sub>(OH<sub>2</sub>)<sub>2</sub>**

|    |           |           |           |
|----|-----------|-----------|-----------|
| W  | -0.000001 | -0.000001 | -0.001469 |
| Cl | 0.170387  | -1.702900 | 1.546492  |
| Cl | 2.220150  | 0.241963  | -0.681629 |
| Cl | -0.168035 | 1.704247  | 1.545264  |
| Cl | -2.221184 | -0.242556 | -0.678039 |
| O  | -0.213938 | 1.693690  | -1.561886 |
| H  | -1.137589 | 1.981657  | -1.551604 |
| H  | 0.318798  | 2.456174  | -1.300454 |
| O  | 0.211562  | -1.695051 | -1.560732 |
| H  | 1.135228  | -1.983010 | -1.551605 |
| H  | -0.320775 | -2.457307 | -1.297825 |

***trans*-WCl<sub>4</sub>(OH<sub>2</sub>)<sub>2</sub>**

|   |          |          |           |
|---|----------|----------|-----------|
| W | 0.000000 | 0.000000 | -0.000000 |
|---|----------|----------|-----------|

**Table S18.** (continued)

|    |           |           |           |
|----|-----------|-----------|-----------|
| Cl | 1.669063  | 1.643038  | 0.086306  |
| Cl | 1.607871  | -1.673618 | 0.350330  |
| O  | 0.447792  | -0.005151 | -2.145618 |
| H  | 0.584053  | -0.902886 | -2.476384 |
| H  | 1.284201  | 0.472500  | -2.257257 |
| Cl | -1.616445 | -1.665598 | -0.349091 |
| Cl | -1.660603 | 1.651523  | -0.087529 |
| O  | -0.447808 | -0.001258 | 2.145620  |
| H  | -0.588677 | -0.898036 | 2.477052  |
| H  | -1.281753 | 0.480765  | 2.256903  |

***cis*-MoCl<sub>4</sub>(OMeH)<sub>2</sub>**

|    |           |           |           |
|----|-----------|-----------|-----------|
| Mo | -0.070356 | -0.039546 | 0.104333  |
| Cl | -0.475217 | 1.557147  | 1.695598  |
| Cl | -2.219360 | -0.398861 | -0.724718 |
| Cl | 0.117575  | -1.760075 | 1.605069  |
| Cl | 2.171164  | 0.370503  | -0.388582 |
| O  | 0.258165  | -1.612009 | -1.544486 |
| C  | 1.196943  | -2.690949 | -1.451080 |
| H  | 2.161964  | -2.245426 | -1.231834 |
| H  | 0.926470  | -3.377031 | -0.648975 |
| H  | 1.243711  | -3.215376 | -2.404457 |
| H  | -0.627687 | -1.958001 | -1.723477 |
| O  | -0.176761 | 1.658070  | -1.444964 |
| C  | -1.121444 | 2.734708  | -1.390956 |
| H  | -1.054153 | 3.323355  | -2.304803 |
| H  | -2.105310 | 2.281975  | -1.319991 |
| H  | -0.950048 | 3.362416  | -0.516999 |
| H  | 0.724347  | 2.009099  | -1.479975 |

***trans*-MoCl<sub>4</sub>(OMeH)<sub>2</sub>**

|    |           |           |           |
|----|-----------|-----------|-----------|
| Mo | -0.015286 | -0.016395 | 0.517325  |
| Cl | 0.184664  | 1.534556  | 2.238299  |
| Cl | 0.632808  | 1.648081  | -1.051575 |
| O  | -2.141491 | 0.431499  | 0.338996  |
| H  | -2.437750 | -0.105586 | -0.412500 |
| C  | -2.626772 | 1.781801  | 0.204098  |
| H  | -2.253480 | 2.236373  | -0.712536 |
| H  | -3.714680 | 1.767618  | 0.217535  |
| H  | -2.250321 | 2.328986  | 1.062069  |
| Cl | -0.456061 | -1.452056 | -1.323433 |
| Cl | -0.407584 | -1.774783 | 1.986708  |
| O  | 2.120067  | -0.454615 | 0.533329  |
| H  | 2.495617  | 0.170550  | -0.106376 |
| C  | 2.629797  | -1.780008 | 0.287858  |
| H  | 3.709734  | -1.771642 | 0.420406  |
| H  | 2.168732  | -2.426913 | 1.026809  |
| H  | 2.362007  | -2.117466 | -0.712455 |

***cis*-MoCl<sub>4</sub>(OMe<sub>2</sub>)<sub>2</sub>**

|    |           |           |           |
|----|-----------|-----------|-----------|
| Mo | 0.203466  | 0.365025  | -0.405228 |
| Cl | 1.914057  | 1.800644  | 0.081403  |
| Cl | 1.089069  | -0.765825 | -2.232654 |
| Cl | -1.024360 | 1.937098  | -1.526862 |
| Cl | -0.942265 | 0.481484  | 1.610843  |
| O  | -1.504960 | -1.193147 | -0.900464 |

|    |           |           |           |
|----|-----------|-----------|-----------|
| Cl | -1.736283 | 1.276872  | -0.950492 |
| Cl | 1.519116  | 1.770520  | -0.358538 |
| O  | -0.564484 | 0.545988  | 2.055443  |
| H  | 0.040592  | 0.052745  | 2.634187  |
| H  | -1.456249 | 0.229295  | 2.258144  |
| Cl | 1.688425  | -1.224333 | 1.105094  |
| Cl | -1.476664 | -1.823980 | 0.202677  |
| O  | 0.577212  | -0.543821 | -2.052481 |
| H  | -0.190069 | -0.509634 | -2.641326 |
| H  | 1.183006  | 0.155611  | -2.349395 |

***cis*-WCl<sub>4</sub>(OMeH)<sub>2</sub>**

|    |           |           |           |
|----|-----------|-----------|-----------|
| W  | -0.057229 | -0.042046 | 0.032738  |
| Cl | -0.558850 | 1.532830  | 1.642812  |
| Cl | -2.192675 | -0.560587 | -0.784447 |
| Cl | 0.257357  | -1.754857 | 1.547006  |
| Cl | 2.157587  | 0.534119  | -0.475152 |
| O  | 0.366976  | -1.593675 | -1.608842 |
| C  | 1.383575  | -2.603353 | -1.520133 |
| H  | 2.314437  | -2.088231 | -1.305880 |
| H  | 1.165972  | -3.306136 | -0.716764 |
| H  | 1.462457  | -3.121076 | -2.474655 |
| H  | -0.491920 | -2.000725 | -1.792795 |
| O  | -0.290987 | 1.649869  | -1.506315 |
| C  | -1.323427 | 2.646202  | -1.459863 |
| H  | -1.275933 | 3.257290  | -2.359662 |
| H  | -2.268020 | 2.112710  | -1.429892 |
| H  | -1.228321 | 3.264636  | -0.568141 |
| H  | 0.579003  | 2.073030  | -1.541613 |

***trans*-WCl<sub>4</sub>(OMeH)<sub>2</sub>**

|    |           |           |           |
|----|-----------|-----------|-----------|
| W  | 0.000142  | 0.013184  | 0.000098  |
| Cl | -1.033360 | -1.591384 | 1.352704  |
| Cl | -0.801939 | 1.738352  | 1.437256  |
| O  | -1.745501 | 0.077742  | -1.315317 |
| H  | -1.545432 | 0.758317  | -1.977080 |
| C  | -3.080718 | 0.263625  | -0.800218 |
| H  | -3.175644 | 1.236365  | -0.319790 |
| H  | -3.790226 | 0.160541  | -1.618279 |
| H  | -3.236769 | -0.522383 | -0.068702 |
| Cl | 0.803115  | 1.712232  | -1.467314 |
| Cl | 1.032462  | -1.615834 | -1.323804 |
| O  | 1.745649  | 0.100484  | 1.314342  |
| H  | 1.546326  | 0.793960  | 1.962825  |
| C  | 3.081353  | 0.274271  | 0.796331  |
| H  | 3.790235  | 0.187869  | 1.616860  |
| H  | 3.237216  | -0.527145 | 0.081698  |
| H  | 3.177473  | 1.236575  | 0.295546  |

***cis*-WCl<sub>4</sub>(OMe<sub>2</sub>)<sub>2</sub>**

|    |           |           |           |
|----|-----------|-----------|-----------|
| W  | 0.000075  | 0.013727  | 0.000533  |
| Cl | -1.712249 | -1.435269 | 0.506919  |
| Cl | 0.093202  | -0.216326 | -2.326943 |
| Cl | 1.663995  | -1.490866 | 0.546495  |
| Cl | 0.071466  | 1.195714  | 2.018344  |
| O  | 1.684666  | 1.532207  | -0.568059 |

**Table S18.** (continued)

|   |           |           |           |
|---|-----------|-----------|-----------|
| C | -2.218515 | -1.945595 | 0.070491  |
| H | -1.533686 | -2.188034 | 0.876645  |
| H | -3.059143 | -1.376365 | 0.473348  |
| H | -2.582128 | -2.867974 | -0.386736 |
| C | -2.261112 | -1.023081 | -2.098948 |
| H | -1.611406 | -0.560302 | -2.834100 |
| H | -2.588957 | -2.000384 | -2.458063 |
| H | -3.127421 | -0.383343 | -1.917857 |
| O | 1.517069  | -1.279423 | 0.728149  |
| C | 2.922247  | -1.263678 | 0.452098  |
| H | 3.430114  | -0.561192 | 1.115587  |
| H | 3.323826  | -2.268181 | 0.597170  |
| H | 3.056831  | -0.956376 | -0.578464 |
| C | 1.294685  | -1.682881 | 2.077359  |
| H | 1.848120  | -2.604078 | 2.268830  |
| H | 1.620977  | -0.906184 | 2.773058  |
| H | 0.233492  | -1.856799 | 2.214393  |

***trans*-MoCl<sub>4</sub>(OMe)<sub>2</sub>**

|    |           |           |           |
|----|-----------|-----------|-----------|
| Mo | 0.006581  | -0.000034 | 0.015009  |
| Cl | -0.162818 | -1.664271 | 1.671734  |
| Cl | -0.162639 | 1.665305  | 1.670679  |
| O  | 2.164880  | -0.000274 | 0.323133  |
| C  | 2.922999  | 1.193683  | 0.090419  |
| H  | 2.310969  | 2.030629  | 0.410899  |
| H  | 3.836329  | 1.144300  | 0.683755  |
| H  | 3.161837  | 1.289676  | -0.969658 |
| C  | 2.922996  | -1.194036 | 0.089466  |
| H  | 2.310914  | -2.031200 | 0.409300  |
| H  | 3.161728  | -1.289191 | -0.970714 |
| H  | 3.836377  | -1.145092 | 0.682758  |
| Cl | 0.175873  | 1.663993  | -1.641958 |
| Cl | 0.175973  | -1.665204 | -1.640878 |
| O  | -2.151675 | 0.000159  | -0.293062 |
| C  | -2.909773 | -1.193768 | -0.059800 |
| H  | -3.148140 | -1.289533 | 1.000398  |
| H  | -3.823326 | -1.144415 | -0.652780 |
| H  | -2.297873 | -2.030773 | -0.380372 |
| C  | -2.909824 | 1.193994  | -0.059613 |
| H  | -3.148340 | 1.289465  | 1.000580  |
| H  | -2.297832 | 2.031065  | -0.379850 |
| H  | -3.823293 | 1.144763  | -0.652738 |

|   |           |          |           |
|---|-----------|----------|-----------|
| C | 1.767151  | 2.860161 | -0.066375 |
| H | 0.755755  | 3.217262 | 0.099782  |
| H | 2.318633  | 2.890944 | 0.875485  |
| H | 2.259548  | 3.492684 | -0.807047 |
| C | 2.948500  | 1.052741 | -1.032940 |
| H | 2.775678  | 0.102956 | -1.527549 |
| H | 3.363357  | 1.771327 | -1.741544 |
| H | 3.634375  | 0.913349 | -0.195209 |
| O | -1.734388 | 1.532920 | -0.583322 |
| C | -2.814594 | 1.000547 | -1.363429 |
| H | -3.560163 | 0.543425 | -0.710694 |
| H | -3.267129 | 1.810721 | -1.937305 |
| H | -2.404986 | 0.254153 | -2.033938 |
| C | -2.233517 | 2.528666 | 0.311175  |
| H | -2.836218 | 3.241213 | -0.254232 |
| H | -2.840863 | 2.071331 | 1.095584  |
| H | -1.390822 | 3.035473 | 0.766984  |

***trans*-WCl<sub>4</sub>(OMe)<sub>2</sub>**

|    |           |           |           |
|----|-----------|-----------|-----------|
| W  | 0.000384  | 0.000070  | -0.000721 |
| Cl | 1.633640  | 0.352714  | -1.673247 |
| Cl | 1.633395  | 0.352791  | 1.672028  |
| O  | -0.368034 | 2.162214  | -0.000799 |
| C  | -0.828154 | 2.811235  | 1.193137  |
| H  | -0.336530 | 2.327657  | 2.031237  |
| H  | -0.546218 | 3.863065  | 1.144982  |
| H  | -1.910328 | 2.709734  | 1.285559  |
| C  | -0.828281 | 2.811136  | -1.194739 |
| H  | -0.336747 | 2.327487  | -2.032850 |
| H  | -1.910466 | 2.709626  | -1.287035 |
| H  | -0.546340 | 3.862969  | -1.146703 |
| Cl | -1.632842 | -0.353397 | 1.671977  |
| Cl | -1.632598 | -0.353466 | -1.673642 |
| O  | 0.367672  | -2.162168 | -0.000634 |
| C  | 0.827900  | -2.811096 | -1.194582 |
| H  | 1.910055  | -2.709343 | -1.287084 |
| H  | 0.546278  | -3.862985 | -1.146426 |
| H  | 0.336115  | -2.327677 | -2.032683 |
| C  | 0.828059  | -2.810983 | 1.193314  |
| H  | 1.910223  | -2.709198 | 1.285673  |
| H  | 0.336365  | -2.327504 | 2.031433  |
| H  | 0.546453  | -3.862882 | 1.145284  |

## Nuclear Magnetic Resonance

**Figure S1.**  $^1\text{H}$  NMR Spectrum of *trans*- $\text{MoCl}_4(\text{Et}_2\text{O})_2$  in  $d_8$ -toluene.

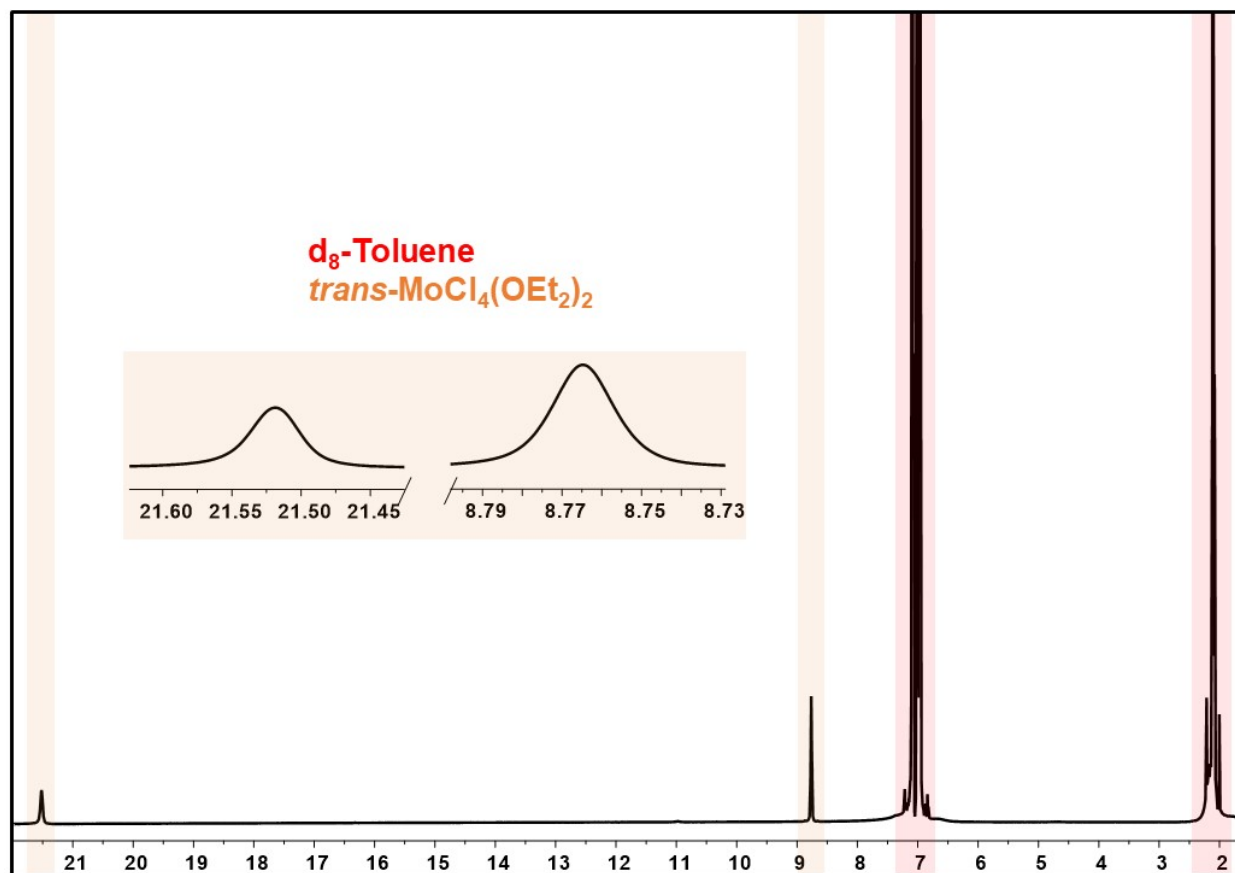

## X-ray Diffraction

**Figure S2.** Thermal ellipsoid plot (30%) and labelling scheme of **4**.

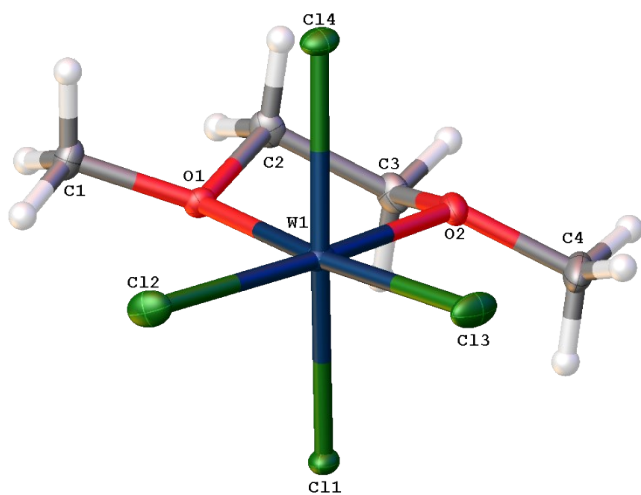

## Magnetic Susceptibility

**Figure S3.** Gouy Susceptibility Calculations

*MoCl<sub>4</sub>(dme)*

First, the mass susceptibility was determined with the following equation:

$$\chi_g = \frac{(R - R_0) \times C \times L}{m \times 10^9}$$

Where R is the reading of the sample and the tube, R<sub>0</sub> is the reading of the empty tube, C is the calibration standard of the balance, L is the length of the sample in the tube, and m is the mass of the sample in the tube.

$$\chi_g = \frac{(346 - (-36)) \times 1 \times 1.9 \text{ cm}}{0.122 \text{ g} \times 10^9} = 5.95 \times 10^{-6} \frac{\text{erg}}{\text{G}^2 \times \text{g}}$$

From there, the molar susceptibility is determined by multiplying the mass susceptibility by the molar mass of the complex.

$$\left(5.95 \times 10^{-6} \frac{\text{erg}}{\text{G}^2 \times \text{g}}\right) \times 327.88 \frac{\text{g}}{\text{mol}} = 1.95 \times 10^{-3} \frac{\text{erg}}{\text{G}^2 \times \text{mol}}$$

The diamagnetic correction values and Pascal's constants for covalent species are then applied<sup>4</sup>.

$$\chi_A = 1.95 \times 10^{-3} \frac{\text{erg}}{\text{G}^2 \times \text{mol}} + 1.731 \times 10^{-4} \frac{\text{erg}}{\text{G}^2 \times \text{mol}} = 2.12 \times 10^{-3} \frac{\text{erg}}{\text{G}^2 \times \text{mol}}$$

Finally,  $\mu_{\text{eff}}$  is determined.

$$\mu_{\text{eff}} = 2.828(\chi_A T)^{\frac{1}{2}} = 2.828\left((2.12 \times 10^{-3} \frac{\text{erg}}{\text{G}^2 \times \text{mol}})(298.15 \text{ K})\right)^{\frac{1}{2}} = 2.25 \text{ B.M.}$$

*WCl<sub>4</sub>(dme)*

First, the mass susceptibility was determined with the following equation:

$$\chi_g = \frac{(R - R_0) \times C \times L}{m \times 10^9}$$

Where R is the reading of the sample and the tube, R<sub>0</sub> is the reading of the empty tube, C is the calibration standard of the balance, L is the length of the sample in the tube, and m is the mass of the sample in the tube.

$$\chi_g = \frac{(135 - (-36)) \times 1 \times 2.03 \text{ cm}}{0.181 \text{ g} \times 10^9} = 1.92 \times 10^{-6} \frac{\text{erg}}{\text{G}^2 \times \text{g}}$$

From there, the molar susceptibility is determined by multiplying the mass susceptibility by the molar mass of the complex.

$$\left(1.92 \times 10^{-6} \frac{\text{erg}}{\text{G}^2 \times \text{g}}\right) \times 415.78 \frac{\text{g}}{\text{mol}} = 7.97 \times 10^{-4} \frac{\text{erg}}{\text{G}^2 \times \text{mol}}$$

The diamagnetic correction values and Pascal's constants for covalent species are then applied<sup>4</sup>.

$$\chi_A = 7.97 \times 10^{-4} \frac{\text{erg}}{\text{G}^2 \times \text{mol}} + 1.791 \times 10^{-4} \frac{\text{erg}}{\text{G}^2 \times \text{mol}} = 9.77 \times 10^{-4} \frac{\text{erg}}{\text{G}^2 \times \text{mol}}$$

Finally,  $\mu_{\text{eff}}$  is determined.

$$\mu_{\text{eff}} = 2.828(\chi_A T)^{\frac{1}{2}} = 2.828\left(9.77 \times 10^{-4} \frac{\text{erg}}{\text{G}^2 \times \text{mol}}\right)(298.15 \text{ K})^{\frac{1}{2}} = 1.53 \text{ B.M.}$$

### Figure S3. SQUID Data Calculations

*MoCl<sub>4</sub>(dme)*

Using the Curie Weiss calculations, the linear fit can be used to calculate the molar susceptibility at any given temperature. Slope = 1.8317, intercept = 146.885

$$y = (1.8317)x + 146.885$$

In this equation, y is the inverse molar susceptibility and x is the temperature. We are extracting the molar susceptibility at 298 K to compare to the benchtop Gouy measurements.

$$\frac{1}{\chi_{\text{mol}}} = (1.8317)(298) + 146.885$$

$$\chi_{\text{mol}} = 1.44 \times 10^{-3}$$

The diamagnetic correction values and Pascal's constants for covalent species are then applied<sup>4</sup>.

$$\chi_A = 1.44 \times 10^{-3} \frac{\text{erg}}{G^2 \times \text{mol}} + 1.731 \times 10^{-4} \frac{\text{erg}}{G^2 \times \text{mol}} = 1.62 \times 10^{-3} \frac{\text{erg}}{G^2 \times \text{mol}}$$

Finally,  $\mu_{\text{eff}}$  is determined.

$$\mu_{\text{eff}, 298K} = 2.828(\chi_A T)^{\frac{1}{2}} = 2.828((1.62 \times 10^{-3} \frac{\text{erg}}{G^2 \times \text{mol}})(298K))^{\frac{1}{2}} = 1.97 \text{ B.M.}$$

*WCl<sub>4</sub>(dme)*

Using the Curie Weiss calculations, the linear fit can be used to calculate the molar susceptibility at any given temperature. Slope = 4.9084, intercept = 402.3757

$$y = (4.9084)x + 402.3757$$

In this equation, y is the inverse molar susceptibility and x is the temperature. We are extracting the molar susceptibility at 298 K to compare to the benchtop Gouy measurements.

$$\frac{1}{\chi_{\text{mol}}} = (4.9084)(298) + 402.3757$$

$$\chi_{\text{mol}} = 5.36 \times 10^{-4}$$

The diamagnetic correction values and Pascal's constants for covalent species are then applied<sup>4</sup>.

$$\chi_A = 5.36 \times 10^{-4} \frac{\text{erg}}{G^2 \times \text{mol}} + 1.791 \times 10^{-4} \frac{\text{erg}}{G^2 \times \text{mol}} = 7.15 \times 10^{-4} \frac{\text{erg}}{G^2 \times \text{mol}}$$

Finally,  $\mu_{\text{eff}}$  is determined.

$$\mu_{\text{eff}, 298K} = 2.828(\chi_A T)^{\frac{1}{2}} = 2.828\left(7.15 \times 10^{-4} \frac{\text{erg}}{G^2 \times \text{mol}}\right)(298K))^{\frac{1}{2}} = 1.31 \text{ B.M.}$$

**Figure S4.** Calculated frontier  $\alpha$  molecular orbitals for triplet *trans*-MoCl<sub>4</sub>(OEt<sub>2</sub>)<sub>2</sub> (C<sub>2h</sub> symmetry, UBLYP+GD3/def2-TZVP, isovalue = 0.04)

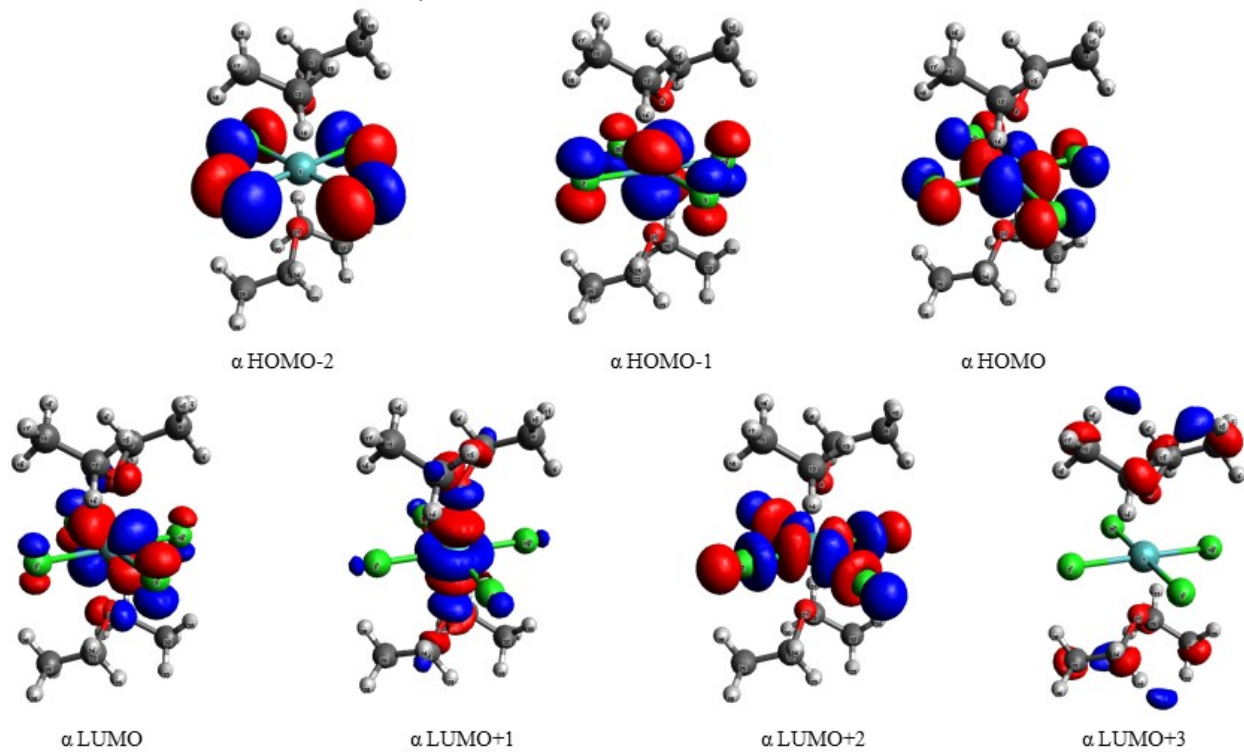



## References

1. Persson, C; Andersson, C., *Inorg. Chim. Acta*, **1993**, *203*, 235-238.
2. Shaw, T. E.; LeMagueres, P.; Sattelberger, A. P.; Jurca, T., *Acta Cryst.*, **2020**, *C76*, 947-951.
3. Shaw, T. E.; Sattelberger, A. P.; Jurca, T., *Acta Cryst.*, **2021**, *C77*, 181-185.
4. Dolomanov, O. V.; Bourhis, L.J.; Gildea, R. J.; Howard, J. A. K.; Puschmann, H., *J. Appl. Cryst.*, **2009**, *42*, 339-341.
5. Sheldrick, G. M., *Acta Cryst.*, **2015**, *A71*, 3-8.
6. Sheldrick, G. M., *Acta Cryst.*, **2008**, *A64*, 112-122.
7. Frisch, M. J.; Trucks, G. W.; Schlegel, H. B.; Scuseria, G. E.; Robb, M. A.; Cheeseman, J. R.; Scalmani, G.; Barone, V.; Mennucci, B.; Petersson, G. A., *Gaussian 09*, Rev. A. 02, Gaussian, Inc., Wallingford CT, **2009**.
8. Zhao, Y.; Truhlar, D. G., *Theor. Chem. Acc.*, **2008**, *120*, 215–241.
9. Weigend, F.; Ahlrichs, R., *Phys. Chem. Chem. Phys.* **2005**, *7*, 3297–3305.
10. Grimme, S.; Antony, J.; Ehrlich, S.; Krieg, H., *J. Chem. Phys.*, **2010**, *132*, 154104.
11. Check, C. E.; Gilbert, T. M., *J. Org. Chem.*, **2005**, *70*, 9828–9834.
12. Zhao, Y.; Schultz, N. E.; Truhlar, D. G., *J. Chem. Phys.*, **2005**, *123*, 161103-1–161103-4.
13. Hanwell, M.D.; Curtis, D.E.; Lonie, D.C.; Vandermeersch, T.; Zurek, E.; Hutchison, G. R., *J. Cheminform*, **2012**, *4*, 17.
14. Riplinger, C.; Neese, F., *J. Chem. Phys.* **2013**, *138*, 034106.
15. Riplinger, C.; Sandhoefer, B.; Hansen, A.; Neese, F., *J. Chem. Phys.* **2013**, *139*, 134101.
16. Riplinger, C.; Pinski, P.; Becker, U.; Valeev, E. F.; Neese, F., *J. Chem. Phys.* **2016**, *144*, 024109.
17. Neese, F., *WIREs Comput. Mol. Sci.* **2012**, *2*, 73-78.
18. Neese, F., *WIREs Comput. Mol. Sci.* **2018**, *8*, e1327.
19. Weigend, F., *Phys. Chem. Chem. Phys.* **2006**, *8*, 1057.
20. Hellweg, A.; Hattig, C.; Hofener, S.; Klopper, W., *Theor. Chem. Acc.* **2007**, *117*, 587.
21. *Kaleidagraph for Macintosh*, Version 4.5.4, Synergy Software, Reading, PA, USA, **2018**.
